# Supplementary material for: Identification of high performance solvents for the sustainable processing of graphene
Source: Royal Society of Chemistry journal article supplement (doi:10.1039/c7gc00112f), 2017-01-01
Supplement: c7gc00112f1.xlsx [file c7gc00112f1.xlsx]

## Sheet: Literature data
	Literature data for graphene dispersion solvents									Literature conclusions for successful liquid exfoliation of graphite
	Measurement of Multicomponent Solubility Parameters for Graphene Facilitates Solvent Discovery									Liquid Exfoliation of Defect-Free Graphene
	Y. Hernandez, M. Lotya, D. Rickard, S. D. Bergin and J. N. Coleman, Langmuir, 2010, 26, 3208-3213.									J. N. Coleman, Accounts of Chemical Research, 2013, 46, 14-22 (and references within).
	Solvent name	Concentration (µg/mL)	Relative concentration to NMP	Included on final solvent shortlist	Reasons for exluding high performance solvents in this assessment (see later)					Criteria
	Cyclopentanone	8.5	1.80851	Yes						Surface energy	Solvents must have a surface energy similar to graphene to delaminate graphite:	E /mN m-1	68
	Cyclohexanone	7.3	1.55319	Yes						Polarity	Solvents must have a certain polarity to successfully disperse graphene:	δD /MPa½	18
	N-Formyl piperidine	7.2	1.53191		Lack of data.							δP /MPa½	9.3
	Vinyl pyrrolidinone	5.5	1.17021		Lack of data.							δH /MPa½	7.7
	Dimethylimidazolidinone	5.4	1.14894		Lack of data.
	Bromobenzene	5.1	1.08511		Failed density/viscosity requirement.
	Benzonitrile	4.8	1.02128	Yes
	Benzyl benzoate	4.7	1		Failed surface tension requirement.
	NMP	4.7	1		Reprotoxic.
	Dimethylpropylene urea	4.6	0.978723
	γ-Butyrolactone	4.1	0.87234
	DMF	4.1	0.87234
	N-Ethyl pyrrolidinone	4	0.851064
	Dimethyl acetamide	3.9	0.829787
	Cyclohexyl pyrrolidinone	3.7	0.787234
	DMSO	3.7	0.787234
	Dibenzyl ether	3.5	0.744681
	Chloroform	3.4	0.723404
	2-Propanol	3.1	0.659574
	Chlorobenzene	2.9	0.617021
	N-Octyl pyrrolidinone	2.8	0.595745
	1,3-Dioxolane	2.8	0.595745
	Ethyl acetate	2.6	0.553191
	Quinoline	2.6	0.553191
	Benzaldehyde	2.5	0.531915
	Ethanolamine	2.5	0.531915
	Diethyl phthalate	2.2	0.468085
	N-Decyl pyrrolidinone	2.1	0.446809
	Pyridine	2	0.425532	Yes
	Dimethyl phthalate	1.8	0.382979
	Formamide	1.7	0.361702
	Ethanol	1.6	0.340426
	Vinyl acetate	1.5	0.319149
	Acetone	1.2	0.255319
	Water	1.1	0.234043
	Ethylene glycol	1	0.212766
	Toluene	0.8	0.170213
	Heptane	0.3	0.0638298
	Hexane	0.2	0.0425532
	Pentane	0.16	0.0340426

## Sheet: Identify problem
	Problem definition
	Method			Influential solvent parameters									Parameter 1	Symbol	Value			Units	Description	Parameter 2	Symbol	Value			Units	Description
	Stage		Description and identification of relevant solvent properties	Melting point	Boiling point	Vapour pressure	Density	Viscosity	Polarity	Surface tension	Partition coefficient	Water solubility
	1	Exfoliation	A mixture of the chosen solvent and graphite is treated with an ultrasonic probe.				May effect sonication cavities		Stabilise exfoliated graphene
			The solubility of graphene is dependent on the polarity and surface tension of the solvent. The effectiveness of the ultrasonic agitation is related to the viscosity and density of the solvent medium, but not in a way that is easily translated into target values for these properties given the present understanding of the process. See stage 2.										Polarity	δD	18			MPa0.5	Dispersion force of graphene (target)	Surface energy	γ	38.2	±	6	dynes/cm	Optimal surface energy (and range)
														δP	9.3			MPa0.5	Dipole forces of graphene (target)
														δH	7.7			MPa0.5	Hydrogen bond forces of graphene (target)
														Ra	≤	5		MPa0.5	Strict requirment
														Ra	≤	6.5		MPa0.5	Borderline solvents
	2	Dispersion	The suspension is centrifuged and filtered.				Settling velocity (Stokes' law)
			The stability of the graphene dispersion is influenced by the settling velocity of the particles, in turn dictated by the viscosity and density of the solvent.										Density:viscosity	ρ/μ	1.2			g/mol.cP	Maximum density:viscosity ratio
	3	Deposition	Samples were drop-casted for analysis (e.g. AFM)		Rate of solvent removal
			The solvent must be removable by evaporation in a controlled manner (80 °C under vacuum).										Boiling point	T	n/a			K	No target or limits set	Vapour pressure	P	n/a			Pa	No target or limits set
	The first phase of the solvent selection process is based on matching the physical properties of solvents to relevant requirements (target values and maximum or minimum permissible values). The relevant properties are highlighted in orange. Pale orange indicates a speculated effect. The requirements are then proposed. For example, polarity is defined with the Hansen solubility parameters. The tar…
	This first phase of solvent selection (physical properties) has been developed in 3 stages. Stage 1 applies what is already understood in the literature. The results formed the initial evaluation of solvents in this work. This was expanded to include stage 2, which introduces the greater understanding we have developed in this work. Stage 3 is a proposal for future work, which will require some i…
	Process		Worksheets
	PHASE 1 Stage 1		"Polarity"
			"Surface tension"
	PHASE 1 Stage 2		"Viscosity and density"
	PHASE 1 Stage 3		Not attempted
	PHASE 2 Stage 1		"Shortlist"
	PHASE 2 Stage 2		"Shortlist"
	PHASE 3		"Final decision"
													http://www.york.ac.uk/res/s4/

## Sheet: Review
	Solvent selection stage gates
	Phase 1			Phase 2		Phase 3
	Stage 1: Polarity and surface energy	Stage 2: Density and viscosity	Stage 3: Volatility (not applicable)	Stage 1: CMR, fatal acute toxicity	Stage 2: PBT (environmental impact)	Greenness
	1,1,2,2-Tetrachloroethane	1,1,2,2-Tetrachloroethane
	1,2,3-Trichloropropane	1,2,3-Trichloropropane
	1,2-Dichlorobenzene	1,2-Dichlorobenzene		1,2-Dichlorobenzene	1,2-Dichlorobenzene
	1,2-Dichloroethane
	2-Pentanone
	Acetic anhydride
	Acetophenone	Acetophenone
	Aniline	Aniline
	Anisole
	Benzaldehyde	Benzaldehyde
	Benzonitrile	Benzonitrile		Benzonitrile	Benzonitrile
	Bromobenzene
	Butyl lactate	Butyl lactate		Butyl lactate	Butyl lactate	Butyl lactate
	Cyclohexanone	Cyclohexanone		Cyclohexanone	Cyclohexanone
	Cyclopentanone	Cyclopentanone		Cyclopentanone	Cyclopentanone
	Cyrene	Cyrene		Cyrene	Cyrene	Cyrene
	Diethyl phthalate	Diethyl phthalate
	Diethylene glycol monobutyl ether	Diethylene glycol monobutyl ether
	Furfural	Furfural
	Levulinic acid
	Morpholine	Morpholine
	N,N-Dimethyl acetamide	N,N-Dimethyl acetamide
	N,N-Dimethyl formamide	N,N-Dimethyl formamide
	Nitrobenzene	Nitrobenzene
	NMP	NMP
	Pyridine	Pyridine		Pyridine	Pyridine
	Tetrahydrofurfuryl alcohol	Tetrahydrofurfuryl alcohol
	Triacetin	Triacetin		Triacetin	Triacetin	Triacetin
	Triethylphosphate
	29	22		8	8	3
	6	5		3	3	3
						Green text indicates bio-based solvents

## Sheet: Polarity
	Solvent name (3 demonstration examples)	Hansen D	Hansen P	Hansen H	Distance in Hansen space	Polarity			Polarity criteria key
	Toluene	18	1.4	2	9.74166	FAIL			Distance <5		Pass
	Acetone	15.5	10.4	7	5.1672	PASS			5< Distance <6.5		Borderline (still considered a pass)
	Tetrahydrofuran	16.8	5.7	8	4.33705	PASS			Distance >6.5		Fail
	The full list of >10,000 solvents used in the polarity screening is not included in this spreadsheet for confidentiality reasons and conciseness. More than half were rejected because of their unsuitable polarity. Many of the remaining solvents are not realistically available to purchase, or do not have any physical property data meaning they cannot be included in subsequent assessments. A 'pass' …
	Target	Hansen D	Hansen P	Hansen H	Reference
	Graphene	18	9.3	7.7	Hernandez et al., Langmuir, 2010, 26, 3208.

## Sheet: Surface tension
	Solvent name	Surface Tension (dynes/cm)	Ref		ΔSurface tension	Difference	Ranking	Pass		Surface tension targets							References
	Triethylphosphate	38.2	HSDB		0	0	1	PASS		16.9	[Wang 2009]						Ab Rani 2014	M. A. Ab Rani et al., Green Chem., 2014, 16, 1282.
	Furfuryl alcohol	38	SOLV-DB		0.2	0.2	2	PASS		45.2	[Hernandez 2008]						Aycock 2007	D. F. Aycock, Org. Process Res. Dev., 2007, 11, 156.
	Benzaldehyde	38	HSDB		0.2	0.2	3	PASS		38.2	[Coleman 2013]						Coleman 2013	J. N. Coleman, Accounts of Chemical Research, 2012, 36, 14-22.
	N-Methyl formamide	37.96	HSDB		0.24	0.24	4	PASS		37.44	Average of recognised solvents DMF, NMP, & 1,2-DCB						Hernandez 2008	Y. Hernandez et al., Nature Nanotechnology, 2008, 3, 563.
	1,3-Butanediol	37.8	Smallwood 1996		0.4	0.4	5	PASS									HSDB	Hazardous substances database. Accessed through the TOXNET portal (US national library of medicine) http://toxnet.nlm.nih.gov/	Accessed May 2014
	1,2,3-Trichloropropane	37.7	HSDB		0.5	0.5	6	PASS		38.2	Selected target		6	Select range			Smallwood 1996	I. M. Smallwood, Handbook of Organic Solvents, Arnold publishing, London, 1996.
	Benzonitrile	38.79	MSDS (Sigma-Aldrich)		-0.59	0.59	7	PASS		32.2	lower limit		PASS				SOLV-DB	http://solvdb.ncms.org/solvdb.htm	Accessed April 2014
	Diphenyl ether	38.82	SOLV-DB		-0.62	0.62	8	PASS		44.2	higher limit		FAIL				Redesta	http://www.redesta.de/html_englisch/cyclopentanon.htm	Accessed May 2015
	Formic acid	37.58	SOLV-DB		0.62	0.62	9	PASS									Rowan SSG	S. Slater and M. Savelski, Journal of Environmental Science and Health Part A, 2007, 42, 1595-1605.
	Morpholine	37.5	Smallwood 1996		0.7	0.7	10	PASS		Target surface tension (to match surface energy of graphene) chosen from the options provided in cell K9. Flexibility in surface tension match entered in cell N9. All solvents within the correct range pass this criteria.							Kwok 1998	D. Y. Kwok et al., Langmuir, 1998, 14, 2221.
	Diethyl phthalate	37.5	HSDB		0.7	0.7	11	PASS									Wang 2009	S. Wang et al., Langmuir, 2009, 25, 11078–11081.
	Benzyl alcohol	39	MSDS (Sigma-Aldrich)		-0.8	0.8	12	PASS
	Methyl lactate	39	SOLV-DB		-0.8	0.8	13	PASS
	Nitromethane	37.19	HSDB		1.01	1.01	14	PASS
	Tetrahydrofurfuryl alcohol	37	SOLV-DB		1.2	1.2	15	PASS
	Levulinic acid	39.7	MSDS (GF Biochemicals)		-1.5	1.5	16	PASS
	1,2-Dichlorobenzene	36.61	HSDB		1.59	1.59	17	PASS
	Acetophenone	39.8	HSDB		-1.6	1.6	18	PASS
	Pyridine	36.6	SOLV-DB		1.6	1.6	19	PASS
	Phenol	36.5	Smallwood 1996		1.7	1.7	20	PASS
	1,2-Propanediol	40.1	HSDB		-1.9	1.9	21	PASS
	m-Dichlorobenzene	36.2	HSDB		2	2	22	PASS
	Bromobenzene	36	HSDB		2.2	2.2	23	PASS
	γ-Butyrolactone	40.43	SOLV-DB		-2.23	2.23	24	PASS
	NMP	40.7	SOLV-DB		-2.5	2.5	25	PASS
	Triacetin	35.52	Kwok 1998		2.68	2.68	26	PASS
	N,N-Dimethyl aniline	35.5	HSDB		2.7	2.7	27	PASS
	Sulpholane	35.5	SOLV-DB		2.7	2.7	28	PASS
	Aniline	41.12	MSDS (Sigma-Aldrich)		-2.92	2.92	29	PASS									Limit	0	6
	Chloroacetic acid	35.17	HSDB		3.03	3.03	30	PASS										80	6
	Cyclohexanone	35.05	SOLV-DB		3.15	3.15	31	PASS
	Propylene carbonate	41.39	SOLV-DB		-3.19	3.19	32	PASS
	Butyl lactate	35	SOLV-DB		3.2	3.2	33	PASS
	N,N-Dimethyl formamide	35	Smallwood 1996		3.2	3.2	34	PASS
	Anisole	35	SOLV-DB		3.2	3.2	35	PASS
	1,1,2,2-Tetrachloroethane	34.72	HSDB		3.48	3.48	36	PASS
	Cyclohexanol	33.91	SOLV-DB		4.29	4.29	37	PASS
	2-Pentanone	33.87	SOLV-DB		4.33	4.33	38	PASS
	N-Methylacetamide	33.67	HSDB		4.53	4.53	39	PASS
	Cyrene	33.6	Courtesy of Laurianne Moity, Université Lille Nord de France		4.6	4.6	40	PASS
	Dimethyl sulphoxide	42.98	SOLV-DB		-4.78	4.78	41	PASS
	Cyclopentanone	33.4	Zeon technical data		4.8	4.8	42	PASS
	Nitrobenzene	43.4	MSDS (Sigma-Aldrich)		-5.2	5.2	43	PASS
	Chlorobenzene	33	MSDS (Sigma-Aldrich)		5.2	5.2	44	PASS
	Furfural	43.5	MSDS (Sigma-Aldrich)		-5.3	5.3	45	PASS
	Oleic acid	32.8	HSDB		5.4	5.4	46	PASS
	Diethylene glycol monobutyl ether	32.8	MSDS (Sigma-Aldrich)		5.4	5.4	47	PASS
	1,4-Dioxane	32.8	SOLV-DB		5.4	5.4	48	PASS
	Acetic anhydride	32.7	MSDS (Sigma-Aldrich)		5.5	5.5	49	PASS
	Nitroethane	32.66	HSDB		5.54	5.54	50	PASS
	N,N-Dimethyl acetamide	32.43	SOLV-DB		5.77	5.77	51	PASS
	Tetraethylene glycol	44.13	SOLV-DB		-5.93	5.93	52	PASS
	1,2-Dichloroethane	32.2	MSDS (Sigma-Aldrich)		6	6	53	PASS
	Solketal: ((2,2-dimethyl-1,3-dioxolan-4-yl)methanol) 4-methanol)	32.1	Glaconchemie technical data		6.1	6.1	54	FAIL
	Carbon disulphide	32	Smallwood 1996		6.2	6.2	55	FAIL
	Dimethyl carbonate	31.925	HSDB		6.275	6.275	56	FAIL
	1,3-Dioxolane-4-methanol (glycerol formal)	44.5	Glaconchemie		-6.3	6.3	57	FAIL
	1,4-Butanediol	44.6	HSDB		-6.4	6.4	58	FAIL
	2-Ethoxyethyl acetate	31.8	HSDB		6.4	6.4	59	FAIL
	α-Terpineol	31.6	SOLV-DB		6.6	6.6	60	FAIL
	Quinoline	45	SOLV-DB		-6.8	6.8	61	FAIL
	1,4-Dichlorobenzene	31.4	HSDB		6.8	6.8	62	FAIL
	Tetrachloroethylene	31.3	SOLV-DB		6.9	6.9	63	FAIL
	Methyl oleate	31.3	HSDB		6.9	6.9	64	FAIL
	Tri(ethylene glycol)	45.2	HSDB		-7	7	65	FAIL
	Acetylacetone	31.2	MSDS (Sigma-Aldrich)		7	7	66	FAIL
	Eugenol	30.929	HSDB		7.271	7.271	67	FAIL
	2-Methoxyethanol (methyl cellosolve)	30.84	SOLV-DB		7.36	7.36	68	FAIL
	Isoeugenol	30.813	HSDB		7.387	7.387	69	FAIL
	Pyrrolidine	30.564	HSDB		7.636	7.636	70	FAIL
	2-Nitropropane	30	Smallwood 1996		8.2	8.2	71	FAIL
	3,3-Dimethyl-2-butanone	29.879	HSDB		8.321	8.321	72	FAIL
	Diethylene glycol monoethyl ether	29.53	SOLV-DB		8.67	8.67	73	FAIL
	Diethylene glycol dimethyl ether	29.5	SOLV-DB		8.7	8.7	74	FAIL
	o-Xylene	29.49	SOLV-DB		8.71	8.71	75	FAIL
	Triethylene glycol dimethyl ether	29.4	HSDB		8.8	8.8	76	FAIL
	Ethyl lactate	29.2	SOLV-DB		9	9	77	FAIL
	Acetonitrile	29	MSDS (Sigma-Aldrich)		9.2	9.2	78	FAIL
	1-Decanol	28.9	HSDB		9.3	9.3	79	FAIL
	Mesitylene	28.84	HSDB		9.36	9.36	80	FAIL
	Dipropylene glycol monomethyl ether	28.8	SOLV-DB		9.4	9.4	81	FAIL
	Trichloroethylene	28.8	SOLV-DB		9.4	9.4	82	FAIL
	Octanoic acid	28.6	MSDS (Sigma-Aldrich)		9.6	9.6	83	FAIL
	Diethylene glycol monomethyl ether	28.49	SOLV-DB		9.71	9.71	84	FAIL
	Ethyl benzene	28.48	SOLV-DB		9.72	9.72	85	FAIL
	Benzene	28.22	HSDB		9.98	9.98	86	FAIL
	2-Ethoxyethanol (ethyl cellosolve)	28.2	SOLV-DB		10	10	87	FAIL
	m-Xylene	28.1	SOLV-DB		10.1	10.1	88	FAIL
	p-Cymene	28.09	HSDB		10.11	10.11	89	FAIL
	Z-1,2-Dichloroethylene	28	HSDB		10.2	10.2	90	FAIL
	Toluene	27.92	SOLV-DB		10.28	10.28	91	FAIL
	Ethylene glycol	48.49	SOLV-DB		-10.29	10.29	92	FAIL
	Di(ethylene glycol)	48.5	HSDB		-10.3	10.3	93	FAIL
	Dichloromethane	27.89	SOLV-DB		10.31	10.31	94	FAIL
	Trichloroacetic acid	27.8	HSDB		10.4	10.4	95	FAIL
	p-Xylene	27.76	SOLV-DB		10.44	10.44	96	FAIL
	Cumene	27.69	MSDS (Sigma-Aldrich)		10.51	10.51	97	FAIL
	Tributylphosphate	27.55	HSDB		10.65	10.65	98	FAIL
	Acetic acid	27.42	SOLV-DB		10.78	10.78	99	FAIL
	Butyronitrile	27.33	HSDB		10.87	10.87	100	FAIL
	Propanenitrile	27.25	HSDB		10.95	10.95	101	FAIL
	Propionic acid	27.21	MSDS (Sigma-Aldrich)		10.99	10.99	102	FAIL
	1-Methoxy-2-propanol	27	Smallwood 1996		11.2	11.2	103	FAIL
	Diethylene glycol dibutyl ether	27	SOLV-DB		11.2	11.2	104	FAIL
	1-Octanol	26.92	SOLV-DB		11.28	11.28	105	FAIL
	Carbon tetrachloride	26.92	SOLV-DB		11.28	11.28	106	FAIL
	d-Limonene	26.87	SOLV-DB		11.33	11.33	107	FAIL
	β-Pinene	26.85	HSDB		11.35	11.35	108	FAIL
	Butyric acid	26.74	MSDS (Sigma-Aldrich)		11.46	11.46	109	FAIL
	Diethylene glycol diethyl ether	26.68	SOLV-DB		11.52	11.52	110	FAIL
	Lauric acid	26.6	HSDB		11.6	11.6	111	FAIL
	Benzyl benzoate	26.6	HSDB		11.6	11.6	112	FAIL
	Cyclohexene	26.56	HSDB		11.64	11.64	113	FAIL
	Chloroform	26.53	SOLV-DB		11.67	11.67	114	FAIL
	Dimethyl sulphide	26.5	HSDB		11.7	11.7	115	FAIL
	Tetrahydrofuran	26.4	SOLV-DB		11.8	11.8	116	FAIL
	2-Octanol	26.38	SOLV-DB		11.82	11.82	117	FAIL
	1-Heptanol	26.2	SOLV-DB		12	12	118	FAIL
	2-Heptanone	26.17	HSDB		12.03	12.03	119	FAIL
	2-Butoxyethanol (butyl cellosolve)	26.14	HSDB		12.06	12.06	120	FAIL
	n-Hexyl acetate	26	SOLV-DB		12.2	12.2	121	FAIL
	1-Bromobutane	25.9	HSDB		12.3	12.3	122	FAIL
	α-Pinene	25.87	HSDB		12.33	12.33	123	FAIL
	1-Hexanol	25.73	SOLV-DB		12.47	12.47	124	FAIL
	1-Pentanol	25.6	SOLV-DB		12.6	12.6	125	FAIL
	1,1,1-Trichloroethane	25.56	SOLV-DB		12.64	12.64	126	FAIL
	2-Hexanone	25.5	SOLV-DB		12.7	12.7	127	FAIL
	3-Pentanone	25.33	MSDS (Sigma-Aldrich)		12.87	12.87	128	FAIL
	Amyl acetate	25.13	SOLV-DB		13.07	13.07	129	FAIL
	Cyclohexane	24.98	Smallwood 1996		13.22	13.22	130	FAIL
	Tributylamine	24.9	HSDB		13.3	13.3	131	FAIL
	1,1-Dichloroethane	24.75	HSDB		13.45	13.45	132	FAIL
	1-Butanol	24.67	SOLV-DB		13.53	13.53	133	FAIL
	1,2-Dimethoxyethane	24.61	HSDB		13.59	13.59	134	FAIL
	Methyl ethyl ketone	24.6	SOLV-DB		13.6	13.6	135	FAIL
	Bromoethane	24.5	HSDB		13.7	13.7	136	FAIL
	Ethyl butyrate	24.5	HSDB		13.7	13.7	137	FAIL
	Methyl butyrate	24.46	SOLV-DB		13.74	13.74	138	FAIL
	3-Methyl-2-butanone	24.3	MSDS (Sigma-Aldrich)		13.9	13.9	139	FAIL
	n-Propyl acetate	24.28	SOLV-DB		13.92	13.92	140	FAIL
	Ethyl propionate	24.27	SOLV-DB		13.93	13.93	141	FAIL
	Methyl acetate	24.1	SOLV-DB		14.1	14.1	142	FAIL
	1,1-Dichloroethylene	24	HSDB		14.2	14.2	143	FAIL
	Ethyl formate	24	HSDB		14.2	14.2	144	FAIL
	Methyl formate	24	HSDB		14.2	14.2	145	FAIL
	2,6-Dimethyl-4-heptanone	23.92	HSDB		14.28	14.28	146	FAIL
	Isoamyl alcohol	23.8	Smallwood 1996		14.4	14.4	147	FAIL
	Ethyl acetate	23.75	SOLV-DB		14.45	14.45	148	FAIL
	Isobutyl acetate	23.7	HSDB		14.5	14.5	149	FAIL
	1-Propanol	23.45	SOLV-DB		14.75	14.75	150	FAIL
	2-Butanol	23.37	SOLV-DB		14.83	14.83	151	FAIL
	n-Decane	23.37	HSDB		14.83	14.83	152	FAIL
	4-Methyl-2-pentanone (methyl isobutyl ketone)	23.29	SOLV-DB		14.91	14.91	153	FAIL
	Butylamine	23.17	SOLV-DB		15.03	15.03	154	FAIL
	Isobutanol	22.98	SOLV-DB		15.22	15.22	155	FAIL
	2-Methyl-2-butanol	22.77	HSDB		15.43	15.43	156	FAIL
	Acetone	22.68	SOLV-DB		15.52	15.52	157	FAIL
	n-Propylamine	22.4	HSDB		15.8	15.8	158	FAIL
	Methanol	22.3	SOLV-DB		15.9	15.9	159	FAIL
	Isopropyl acetate	22.1	SOLV-DB		16.1	16.1	160	FAIL
	Ethanol	21.99	SOLV-DB		16.21	16.21	161	FAIL
	Dibutyl ether	21.99	SOLV-DB		16.21	16.21	162	FAIL
	1-Chloropropane	21.78	HSDB		16.42	16.42	163	FAIL
	n-Octane	21.7	Smallwood 1996		16.5	16.5	164	FAIL
	Diethoxymethane (ethylal)	21.62	Lambiotte technical data		16.58	16.58	165	FAIL
	Ethanethiol	21.62	HSDB		16.58	16.58	166	FAIL
	Methylcyclopentane	21.6	HSDB		16.6	16.6	167	FAIL
	Acetaldehyde	21.2	HSDB		17	17	168	FAIL
	Dimethoxymethane	21.1	HSDB		17.1	17.1	169	FAIL
	2-Propanol	20.93	HSDB		17.27	17.27	170	FAIL
	Triethylamine	20.66	SOLV-DB		17.54	17.54	171	FAIL
	Diethylamine	19.85	MSDS (Sigma-Aldrich)		18.35	18.35	172	FAIL
	t-Butyl ethyl ether	19.8	HSDB		18.4	18.4	173	FAIL
	n-Heptane	19.7	SOLV-DB		18.5	18.5	174	FAIL
	t-Butyl methyl ether	19.07	SOLV-DB		19.13	19.13	175	FAIL
	Isooctane (2,2,4-trimethylpentane)	18.33	Smallwood 1996		19.87	19.87	176	FAIL
	2-Chloropropane	18.09	HSDB		20.11	20.11	177	FAIL
	Formamide	58.35	HSDB		-20.15	20.15	178	FAIL
	Decamethylcyclopentasiloxane (D5)	18.04	Ab Rani 2014		20.16	20.16	179	FAIL
	n-Hexane	17.94	SOLV-DB		20.26	20.26	180	FAIL
	Octamethylcyclotetrasiloxane (D4)	17.93	Ab Rani 2014		20.27	20.27	181	FAIL
	Diisopropyl ether	17.34	SOLV-DB		20.86	20.86	182	FAIL
	Octamethyltrisiloxane (MDM)	16.95	Ab Rani 2014		21.25	21.25	183	FAIL
	Diethyl ether	16.5	SOLV-DB		21.7	21.7	184	FAIL
	Dimethyl ether	16	HSDB		22.2	22.2	185	FAIL
	Hexamethyldisiloxane (M2)	15.7	Ab Rani 2014		22.5	22.5	186	FAIL
	n-Pentane	15.48	SOLV-DB		22.72	22.72	187	FAIL
	Butyl acetate	14.5	HSDB		23.7	23.7	188	FAIL
	Glycerol	63.4	MSDS (Sigma-Aldrich)		-25.2	25.2	189	FAIL
	PPG-1200 (n = 20)	63.62	MSDS (Sigma-Aldrich)		-25.42	25.42	190	FAIL
	Dimethyl glutarate	67.3	MSDS (Sigma-Aldrich)		-29.1	29.1	191	FAIL
	Water	72.75	Smallwood 1996		-34.55	34.55	192	FAIL
	MEAN	30.1218
	SD	9.1193

## Sheet: Preliminary shortlist
	Solvents are presented in this shortlist if data was available to assess at least one additional criteria to polarity. The full list of solvents is not given because of a shortage of viscosity and surface tension data and proprietary polarity data.
	Solvent name	Hansen D	Hansen P	Hansen H	Distance in Hansen space	Polarity	Surface tension		All technical requirements		Polarity notes
	1,1,1-Trichloroethane	16.8	4.3	2	7.95	FAIL	FAIL		Fail			Fail
	1,1,2,2-Tetrachloroethane	18.8	5.1	5.3	5.1	PASS	PASS		Pass	1,1,2,2-Tetrachloroethane	Borderline (still considered a pass)
	1,1-Dichloroethane	16.5	7.8	3	5.77	PASS	FAIL		Fail
	1,1-Dichloroethylene	16.4	5.2	2.4	7.43	FAIL	FAIL		Fail			Fail						surface ten		Ra	rank
	1,2,3-Trichloropropane	17.8	12.3	3.4	5.26	PASS	PASS		Pass	1,2,3-Trichloropropane	Borderline (still considered a pass)				Triethylphosphate			38.2	0	3.66	6
	1,2-Dichlorobenzene	19.2	6.3	3.3	5.84	PASS	PASS		Pass	1,2-Dichlorobenzene	Borderline (still considered a pass)				Benzaldehyde			38	-0.2	4.15	11
	1,2-Dichloroethane	18	7.4	4.1	4.07	PASS	PASS		Pass	1,2-Dichloroethane	Strong polarity match				1,2,3-Trichloropropane			37.7	-0.5	5.26	14
	1,2-Dimethoxyethane	15.8	5.9	6.1	5.79	PASS	FAIL		Fail						Benzonitrile			38.79	0.59	5.4	18
	1,2-Propanediol	16.8	10.4	21.3	13.85	FAIL	PASS		Fail						Morpholine			37.5	-0.7	5.5	20
	1,3-Butanediol	16.5	8.1	20.9	13.59	FAIL	PASS		Fail						Diethyl phthalate			37.5	-0.7	3.31	4
	1,3-Dioxolane-4-methanol (glycerol formal)	18.4	10.6	16.5	8.93	FAIL	FAIL		Fail			Fail			Tetrahydrofurfuryl alcohol			37	-1.2	5.33	17
	1,4-Butanediol	16.6	11	20.9	13.6	FAIL	FAIL		Fail			Fail			Levulinic acid			39.7	1.5	6.17	25
	1,4-Dichlorobenzene	19.7	5.6	2.7	7.09	FAIL	FAIL		Fail			Fail			1,2-Dichlorobenzene			36.61	-1.59	4.07	10
	1,4-Dioxane	17.5	1.8	9	7.68	FAIL	PASS		Fail						Acetophenone			39.8	1.6	4.04	8
	1-Bromobutane	16.5	4.1	3.9	7.1	FAIL	FAIL		Fail			Fail			Pyridine			36.6	-1.6	2.74	1
	1-Butanol	16	5.7	15.8	9.72	FAIL	FAIL		Fail			Fail			Bromobenzene			36	-2.2	5.76	21
	1-Chloropropane	16	7.8	2	7.1232	FAIL	FAIL		Fail			Fail			NMP			40.7	2.5	3.04	3
	1-Decanol	16	4.7	10.5	6.71	FAIL	FAIL		Fail			Fail			Triacetin			35.52	-2.68	5.83	24
	1-Heptanol	16	5.3	11.7	6.93	FAIL	FAIL		Fail			Fail			Aniline			41.12	2.92	6.49	28
	1-Hexanol	15.9	5.8	12.5	7.28	FAIL	FAIL		Fail			Fail			Cyclohexanone			35.05	-3.15	2.78	2
	1-Methoxy-2-propanol	15.6	6.3	11.6	6.87	FAIL	FAIL		Fail			Fail			Butyl lactate			35	-3.2	5.78	22
	1-Octanol	16	5	11.2	6.84	FAIL	FAIL		Fail			Fail			N,N-Dimethyl formamide			35	-3.2	5.81	23
	1-Pentanol	15.9	5.9	13.9	8.22	FAIL	FAIL		Fail			Fail			Anisole			35	-3.2	4.98	12
	1-Propanol	16	6.8	17.4	10.79	FAIL	FAIL		Fail			Fail			1,1,2,2-Tetrachloroethane			34.72	-3.48	5.1	13
	2,6-Dimethyl-4-heptanone	16	3.7	4.1	7.77	FAIL	FAIL		Fail			Fail			2-Pentanone			33.87	-4.33	5.28	15
	2-Aminoethanol	17	15.5	21	14.81	FAIL	NO DATA		Fail						Cyrene			33.6	-4.6	2.21133	0
	2-Butanol	15.8	5.7	14.5	8.86	FAIL	FAIL		Fail			Fail			Cyclopentanone			33.4	-4.8	3.61	5
	2-Butoxyethanol (butyl cellosolve)	16	5.1	12.3	7.4	FAIL	FAIL		Fail			Fail			Nitrobenzene			43.4	5.2	6.23	26
	2-Chloropropane	15	8	2	8.37735	FAIL	FAIL		Fail			Fail			Furfural			43.5	5.3	6.29	27
	2-Ethoxyethanol (ethyl cellosolve)	15.9	7.2	14	7.86	FAIL	FAIL		Fail			Fail			Diethylene glycol monobutyl ether			32.8	-5.4	5.45	19
	2-Ethoxyethyl acetate	15.9	4.7	10.6	6.87	FAIL	FAIL		Fail			Fail			N,N-Dimethyl acetamide			32.43	-5.77	3.67	7
	2-Ethylhexanol	15.9	3.3	11.8	8.39	FAIL	NO DATA		Fail						1,2-Dichloroethane			32.2	-6	4.07	10
	2-Heptanone	16.2	5.7	4.1	6.24	PASS	FAIL		Fail						Acetic anhydride			32.7	-5.5	5.29	16
	2-Hexanone	15.3	6.1	4.1	7.24	FAIL	FAIL		Fail			Fail
	2-Methoxyethanol (methyl cellosolve)	16	8.2	15	8.4	FAIL	FAIL		Fail			Fail
	2-Methyl-2-butanol	15.3	6.1	13.3	8.41	FAIL	FAIL		Fail			Fail
	2-Methyltetrahydrofuran	16.9	5	4.3	5.91	PASS	NO DATA		Fail					The three candidates that exceed NMP are (1) Cyrene, (2) pyridine, and (3) cyclohexanone. Experimental evaluation shows pyridine to be a poorer solvent than NMP, and cyclohexanone better than NMP (see "Literature data" worksheet). This indicates that the solvent selection procedure is wrong or incomplete. Regardless, this was the justification to apply Cyrene as a solvent for the liquid exfoliati…
	2-Nitropropane	16.2	12.1	4.1	5.81	PASS	FAIL		Fail
	2-Octanol	16.1	4.2	9.1	6.51	FAIL	FAIL		Fail			Fail
	2-Pentanone	16	7.6	4.7	5.28	PASS	PASS		Pass	2-Pentanone	Borderline (still considered a pass)
	2-Propanol	15.8	6.1	16.4	10.26	FAIL	FAIL		Fail			Fail
	2-Pyrrolidinone	18.2	12	9	3.02	PASS	NO DATA		Fail
	3,3-Dimethyl-2-butanone	15.1	5.5	3.3	8.21	FAIL	FAIL		Fail			Fail
	3-Methyl-2-butanone	15.6	6.7	4	6.59	PASS	FAIL		Fail
	3-Pentanone	15.8	7.6	4.7	5.59	PASS	FAIL		Fail
	4-Methyl-2-pentanone (methyl isobutyl ketone)	15.3	6.1	4.1	7.24	FAIL	FAIL		Fail			Fail
	Acetaldehyde	14.7	12.5	7.9	7.34	FAIL	FAIL		Fail			Fail
	Acetic acid	14.5	8	13.5	9.18	FAIL	FAIL		Fail			Fail
	Acetic anhydride	16	11.7	10.2	5.29	PASS	PASS		Pass	Acetic anhydride	Borderline (still considered a pass)
	Acetone	15.5	10.4	7	5.17	PASS	FAIL		Fail
	Acetonitrile	15.3	18	6.1	10.36	FAIL	FAIL		Fail			Fail
	Acetophenone	18.8	9	4	4.04	PASS	PASS		Pass	Acetophenone	Strong polarity match
	Acetylacetone	16.1	10	6.2	4.14	PASS	FAIL		Fail
	Acetyltributyl citrate	16.7	2.5	7.4	7.29	FAIL	NO DATA		Fail
	Amyl acetate	15.8	3.3	6.1	7.61	FAIL	FAIL		Fail			Fail
	Aniline	20.1	5.8	11.2	6.49	PASS	PASS		Pass	Aniline	Borderline (still considered a pass)
	Anisole	17.8	4.4	6.9	4.98	PASS	PASS		Pass	Anisole	Strong polarity match
	Benzaldehyde	19.4	7.4	5.3	4.15	PASS	PASS		Pass	Benzaldehyde	Strong polarity match
	Benzene	18.4	0	2	10.94	FAIL	FAIL		Fail			Fail
	Benzonitrile	18.8	12	3.3	5.4	PASS	PASS		Pass	Benzonitrile	Borderline (still considered a pass)
	Benzyl alcohol	18.4	6.3	13.7	6.76	FAIL	PASS		Fail
	Benzyl benzoate	20	5.1	5.2	6.32	PASS	FAIL		Fail
	Bromobenzene	19.2	5.5	4.1	5.76	PASS	PASS		Pass	Bromobenzene	Borderline (still considered a pass)
	Bromoethane	16.5	8.4	2.3	6.24	PASS	FAIL		Fail
	Butyl acetate	15.8	3.7	6.3	7.26	FAIL	FAIL		Fail			Fail
	Butyl lactate	15.8	6.5	10.2	5.78	PASS	PASS		Pass	Butyl lactate	Borderline (still considered a pass)
	Butylamine	16.2	4.5	8	6.01	PASS	FAIL		Fail
	Butyric acid	15.7	4.8	12	7.74	FAIL	FAIL		Fail			Fail
	Butyronitrile	15.3	12.4	5.1	6.75	FAIL	FAIL		Fail			Fail
	Carbon disulphide	20.2	0	0.6	12.5	FAIL	FAIL		Fail			Fail
	Carbon tetrachloride	17.8	0	0.6	11.71	FAIL	FAIL		Fail			Fail
	Chloroacetic acid	17.6	11	15.9	8.41249	FAIL	PASS		Fail
	Chlorobenzene	19	4.3	2	7.84	FAIL	PASS		Fail
	Chloroform	17.8	3.1	5.7	6.53	PASS	FAIL		Fail
	cis-Decalin	17.6	0	0	12.1	FAIL	NO DATA		Fail
	Cumene	18.1	1.2	1.2	10.39	FAIL	FAIL		Fail			Fail
	Cyclohexane	16.8	0	0.2	12.19	FAIL	FAIL		Fail			Fail
	Cyclohexanol	17.4	4.1	13.5	7.88	FAIL	PASS		Fail
	Cyclohexanone	17.8	8.4	5.1	2.78	PASS	PASS		Pass	Cyclohexanone	Strong polarity match
	Cyclohexene	17.2	1	2	10.2	FAIL	FAIL		Fail			Fail
	Cyclopentane	16.4	0	1.8	11.47	FAIL	NO DATA		Fail
	Cyclopentanone	17.9	11.9	5.2	3.61	PASS	PASS		Pass	Cyclopentanone	Strong polarity match
	Cyrene	18.8	10.6	6.9	2.21133	PASS	PASS		Pass	Cyrene	Strong polarity match
	DCM	17	7.3	7.1	2.89	PASS	FAIL		Fail
	Decamethylcyclopentasiloxane (D5)	12.9	1.3	1	14.59	FAIL	FAIL		Fail			Fail
	Di(ethylene glycol)	16.6	12	19	11.95	FAIL	FAIL		Fail			Fail
	Dibenzyl ether	19.6	3.4	5.2	7.16	FAIL	NO DATA		Fail
	Dibutoxymethane	15.7	4	3.9	7.9806	FAIL	NO DATA		Fail
	Dibutyl ether	15.2	3.4	3.2	9.29624	FAIL	FAIL		Fail			Fail
	Diethoxymethane (ethylal)	15.4	5.7	5.1	6.83813	FAIL	FAIL		Fail			Fail
	Diethyl ether	14.5	2.9	4.6	9.97848	FAIL	FAIL		Fail			Fail
	Diethyl phthalate	17.6	9.6	4.5	3.31	PASS	PASS		Pass	Diethyl phthalate	Strong polarity match
	Diethylamine	14.9	2.3	6.1	9.49	FAIL	FAIL		Fail			Fail
	Diethylene glycol dibutyl ether	15.8	4.7	4.4	7.17	FAIL	FAIL		Fail			Fail
	Diethylene glycol diethyl ether	15.8	5.9	5.6	5.94	PASS	FAIL		Fail
	Diethylene glycol dimethyl ether	16	5.9	6.2	5.45985	PASS	FAIL		Fail
	Diethylene glycol monobutyl ether	16	7	10.6	5.45	PASS	PASS		Pass	Diethylene glycol monobutyl ether	Borderline (still considered a pass)
	Diethylene glycol monoethyl ether	16.1	9.2	12.2	5.89	PASS	FAIL		Fail
	Diethylene glycol monomethyl ether	16.2	7.8	12.6	6.26	PASS	FAIL		Fail
	Diisopropyl ether	15.1	3.2	3.2	9.54	FAIL	FAIL		Fail			Fail
	Dimethoxymethane	15	1.8	8.6	9.65	FAIL	FAIL		Fail			Fail
	Dimethyl carbonate	15.5	8.6	9.7	5.43	PASS	FAIL		Fail
	Dimethyl ether	15.2	6.1	5.7	6.75278	FAIL	FAIL		Fail			Fail
	Dimethyl glutarate	16.1	7.7	8.3	4.17	PASS	FAIL		Fail
	Dimethyl isosorbide	17.6	7.1	7.5	2.35	PASS	NO DATA		Fail
	Dimethyl phthalate	18.6	10.8	4.9	3.4	PASS	NO DATA		Fail
	Dimethyl sulphide	16.1	6.4	7.4	4.79	PASS	FAIL		Fail
	Dimethyl sulphoxide	18.4	16.4	10.2	7.57	FAIL	PASS		Fail
	Diphenyl ether	19.4	3.4	4	7.51	FAIL	PASS		Fail
	Dipropylene glycol	16.5	10.6	17.7	10.52	FAIL	NO DATA		Fail
	Dipropylene glycol monomethyl ether	15.5	5.7	11.2	7.09	FAIL	FAIL		Fail			Fail
	d-Limonene	17.2	1.8	4.3	8.39	FAIL	FAIL		Fail			Fail
	Ethanethiol	15.7	6.5	7.1	5.42	PASS	FAIL		Fail
	Ethanol	15.8	8.8	19.4	12.51	FAIL	FAIL		Fail			Fail
	Ethoxybenzene	18.4	4.5	4	6.11	PASS	NO DATA		Fail
	Ethyl acetate	15.8	5.3	7.2	5.97	PASS	FAIL		Fail
	Ethyl benzene	17.8	0.6	1.4	10.7	FAIL	FAIL		Fail			Fail
	Ethyl butyrate	15.5	5.6	5	6.78	FAIL	FAIL		Fail			Fail
	Ethyl formate	15.5	8.4	8.4	5.13	PASS	FAIL		Fail
	Ethyl lactate	16	7.6	12.5	6.48	PASS	FAIL		Fail
	Ethyl morpholine	17.7	5	6.6	4.48	PASS	NO DATA		Fail
	Ethyl propionate	15.5	6.1	4.9	6.56	PASS	FAIL		Fail
	Ethylene glycol	17	11	26	18.49	FAIL	FAIL		Fail			Fail
	Ethylene glycol dibutyl ether	15.7	4.5	4.2	7.51	FAIL	NO DATA		Fail
	Ethylene glycol diethyl ether	15.4	5.4	5.2	6.96	FAIL	NO DATA		Fail
	Ethylenediamine	16.6	8.8	17	9.73	FAIL	NO DATA		Fail
	Eugenol	19	7.5	13	5.94	PASS	FAIL		Fail
	Formamide	17.2	26.2	19	20.39	FAIL	FAIL		Fail			Fail
	Formic acid	14.6	10	14	9.3	FAIL	PASS		Fail
	Furan	17	1.8	5.3	8.12	FAIL	NO DATA		Fail
	Furfural	18.6	14.9	5.1	6.29	PASS	PASS		Pass	Furfural	Borderline (still considered a pass)
	Furfuryl alcohol	17.4	7.6	15.1	7.69	FAIL	PASS		Fail
	Glycerol	17.4	11.3	27.2	19.64	FAIL	FAIL		Fail			Fail
	Glycerol carbonate	17.9	25.5	17.4	18.88	FAIL	NO DATA		Fail
	Heptanoic acid	16.1	5.2	10.3	6.17	PASS	NO DATA		Fail
	Hexamethyldisiloxane (M2)	12.6	2	0	15.14	FAIL	FAIL		Fail			Fail
	Isoamyl acetate	15.3	3.1	7	8.25	FAIL	NO DATA		Fail
	Isoamyl alcohol	15.8	5.2	13.3	8.22	FAIL	FAIL		Fail			Fail
	Isobutanol	15.1	5.7	15.9	10.67	FAIL	FAIL		Fail			Fail
	Isobutyl acetate	15.1	3.7	6.3	8.18	FAIL	FAIL		Fail			Fail
	Isoeugenol	18.9	5.7	9.9	4.59	PASS	FAIL		Fail
	Isooctane (2,2,4-trimethylpentane)	14.1	0	0	14.37	FAIL	FAIL		Fail			Fail
	Isopropyl acetate	14.9	4.5	8.2	7.86	FAIL	FAIL		Fail			Fail
	Lauric acid	16.2	4.1	7.4	6.33	PASS	FAIL		Fail
	Levulinic acid	17.1	10.4	13.5	6.17	PASS	PASS		Pass	Levulinic acid	Borderline (still considered a pass)
	m-Cresol	18.5	6.5	13.7	6.7	FAIL	NO DATA		Fail
	m-Dichlorobenzene	19.2	5.1	2.7	6.96	FAIL	PASS		Fail
	Mesitylene	18	0.6	0.6	11.23	FAIL	FAIL		Fail			Fail
	Methanol	14.7	12.3	22.3	16.3	FAIL	FAIL		Fail			Fail
	Methyl acetate	15.5	7.2	7.6	5.42	PASS	FAIL		Fail
	Methyl butyrate	15.8	4.9	6.2	6.40078	PASS	FAIL		Fail
	Methyl ethyl ketone	16	9	5.1	4.78	PASS	FAIL		Fail
	Methyl formate	15.3	8.4	10.2	6.02	PASS	FAIL		Fail
	Methyl lactate	16.9	8.3	16.1	8.74	FAIL	PASS		Fail
	Methyl oleate	16.2	3.8	4.5	7.31	FAIL	FAIL		Fail			Fail
	Methylcyclopentane	16	0	1	12.1	FAIL	FAIL		Fail			Fail
	Morpholine	18	4.9	11	5.5	PASS	PASS		Pass	Morpholine	Borderline (still considered a pass)
	m-Xylene	17.8	2.6	2.8	8.31	FAIL	FAIL		Fail			Fail
	N,N-Dimethyl acetamide	16.8	11.5	9.4	3.67	PASS	PASS		Pass	N,N-Dimethyl acetamide	Strong polarity match
	N,N-Dimethyl aniline	18.3	3.2	5.5	6.51	FAIL	PASS		Fail
	N,N-Dimethyl formamide	17.4	13.7	11.3	5.81	PASS	PASS		Pass	N,N-Dimethyl formamide	Borderline (still considered a pass)
	N,N'-Dimethylethyleneurea (DMEU)	18.2	10	8.1	0.9	PASS	NO DATA		Fail
	n-Decane	15.7	0	0	12.92	FAIL	FAIL		Fail			Fail
	n-Heptane	15.3	0	0	13.23	FAIL	FAIL		Fail			Fail
	n-Hexane	14.9	0	0	13.57	FAIL	FAIL		Fail			Fail
	n-Hexyl acetate	15.8	2.9	5.9	7.97	FAIL	FAIL		Fail			Fail
	Nitrobenzene	20	10.6	3.1	6.23	PASS	PASS		Pass	Nitrobenzene	Borderline (still considered a pass)
	Nitroethane	16	15.5	4.5	8.04	FAIL	PASS		Fail
	Nitromethane	15.8	18.8	6.1	10.59	FAIL	PASS		Fail
	N-Methyl formamide	17.4	18.8	15.9	12.61	FAIL	PASS		Fail
	N-Methylacetamide	16.9	17	13	9.6	FAIL	PASS		Fail
	NMP	18	12.3	7.2	3.04	PASS	PASS		Pass	NMP	Strong polarity match
	n-Octane	15.5	0	0	13.07	FAIL	FAIL		Fail			Fail
	n-Pentane	14.5	0	0	14	FAIL	FAIL		Fail			Fail
	n-Propyl acetate	15.3	4.3	7.6	7.36	FAIL	FAIL		Fail			Fail
	n-Propylamine	16	4.9	8.6	6.01	PASS	FAIL		Fail
	Octamethylcyclotetrasiloxane (D4)	12.8	1.3	1	14.73	FAIL	FAIL		Fail			Fail
	Octamethyltrisiloxane (MDM)	12.2	1.8	0	15.81	FAIL	FAIL		Fail			Fail
	Octanoic acid	15.7	3.3	8.2	7.58	FAIL	FAIL		Fail			Fail
	Oleic acid	16	2.8	6.2	7.78	FAIL	PASS		Fail
	Omnia: Butyl-3-hydroxybutyrate	16.5	5.9	10.7	5.43691	PASS	NO DATA		Fail
	o-Xylene	17.8	1	3.1	9.5	FAIL	FAIL		Fail			Fail
	p-Cymene	17.3	2.4	2.4	8.8	FAIL	FAIL		Fail			Fail
	Phenol	18.5	5.9	14.9	8.02	FAIL	PASS		Fail
	Propanenitrile	15.3	14.3	5.5	7.7	FAIL	FAIL		Fail			Fail
	Propionic acid	14.7	5.3	12.4	9.04	FAIL	FAIL		Fail			Fail
	Propylene carbonate	20	18	4.1	10.23	FAIL	PASS		Fail
	p-Xylene	17.8	1	3.1	9.5	FAIL	FAIL		Fail			Fail
	Pyridine	19	8.8	5.9	2.74	PASS	PASS		Pass	Pyridine	Strong polarity match
	Pyrrolidine	17.9	6.5	7.4	2.82	PASS	FAIL		Fail
	Quinoline	20.5	5.6	5.7	6.53	FAIL	FAIL		Fail			Fail
	Solketal: ((2,2-dimethyl-1,3-dioxolan-4-yl)methanol) 4-methanol)	16.6	7.9	12	5.31883	PASS	FAIL		Fail
	Sulpholane	17.8	17.4	8.7	8.17	FAIL	PASS		Fail
	t-Butyl ethyl ether	14.4	3.5	2.7	10.51	FAIL	FAIL		Fail			Fail
	t-Butyl methyl ether	14.8	4.3	5	8.56	FAIL	FAIL		Fail			Fail
	Tetrachloroethylene	18.3	5.7	0	8.52	FAIL	FAIL		Fail			Fail
	Tetraethylene glycol	16.4	9.4	15.3	8.25	FAIL	PASS		Fail
	Tetrahydrofuran	16.8	5.7	8	4.34	PASS	FAIL		Fail
	Tetrahydrofurfuryl alcohol	17.8	8.2	12.9	5.33	PASS	PASS		Pass	Tetrahydrofurfuryl alcohol	Borderline (still considered a pass)
	Toluene	18	1.4	2	9.74	FAIL	FAIL		Fail			Fail
	Tri(ethylene glycol)	16	12.5	18.6	12.04	FAIL	FAIL		Fail			Fail
	Triacetin	16.5	4.5	9.1	5.83	PASS	PASS		Pass	Triacetin	Borderline (still considered a pass)
	Tributylamine	15.7	2.2	2.1	10.15	FAIL	FAIL		Fail			Fail
	Tributylphosphate	16.3	6.3	4.3	5.67	PASS	FAIL		Fail
	Trichloroacetic acid	18.3	7	13	5.81	PASS	FAIL		Fail
	Trichloroethylene	18	3.1	5.3	6.65	FAIL	FAIL		Fail			Fail
	Triethylamine	15.5	0.4	1	12.21	FAIL	FAIL		Fail			Fail
	Triethylcitrate	16.5	4.9	12	6.84	FAIL	NO DATA		Fail
	Triethylene glycol dimethyl ether	15.9	5.9	6.4	5.56	PASS	FAIL		Fail
	Triethylphosphate	16.7	11.4	9.2	3.66	PASS	PASS		Pass	Triethylphosphate	Strong polarity match
	Water	15.5	16	42.3	35.6	FAIL	FAIL		Fail			Fail
	Z-1,2-Dichloroethylene	17	8	3.2	5.09	PASS	FAIL		Fail
	α-Pinene	16.4	1.1	2.2	10.38	FAIL	FAIL		Fail			Fail
	α-Terpineol	17.1	3.6	7.6	5.98	PASS	FAIL		Fail
	β-Pinene	16.3	1.1	1.9	10.6	FAIL	FAIL		Fail			Fail
	γ-Butyrolactone	18	16.6	7.4	7.31	FAIL	PASS		Fail
	γ-Valerolactone	16.9	11.5	6.3	3.41	PASS	NO DATA		Fail
	Total solvents meeting at least one requirement:	120				80	53		Number of solvents:		29
						http://www.york.ac.uk/res/s4/

## Sheet: Viscosity and density
	Solvent name	Density (g/mL)	Ref	Dynamic viscosity (cP)	log (viscosity)*	Temp for viscosity (°C)	Ref		Density:viscosity ratio	Density:viscosity threshold	Ranking	Pass		References
	Glycerol	1.25	MSDS (Sigma-Aldrich)	954	2.97955	25	HSDB		0.00131027		1	PASS		Ab Rani 2014	M. A. Ab Rani et al., Green Chem., 2014, 16, 1282.
	Dipropylene glycol	1.023	MSDS (Sigma-Aldrich)	107	2.02938	20	HSDB		0.00956075		2	PASS		Aycock 2007	D. F. Aycock, Org. Process Res. Dev., 2007, 11, 156.
	1,3-Butanediol	1	SOLV-DB	98.3	1.99255	?	SOLV-DB		0.0101729		3	PASS		HSDB	Hazardous substances database. Accessed through the TOXNET portal (US national library of medicine) http://toxnet.nlm.nih.gov/			Accessed May 2014
	1,4-Butanediol	1.017	MSDS (Sigma-Aldrich)	84.9	1.92891	20	HSDB		0.0119788		4	PASS		Smallwood 1996	I. M. Smallwood, Handbook of Organic Solvents, Arnold publishing, London, 1996.
	Glycerol carbonate	1.4	Glaconchemie technical data	85	1.92942	25	Glaconchemie technical data		0.0164706		5	PASS		SOLV-DB	http://solvdb.ncms.org/solvdb.htm			Accessed April 2014
	Tetraethylene glycol	1.13	SOLV-DB	61.9	1.79169	20	HSDB		0.0182553		6	PASS		Redesta	http://www.redesta.de/html_englisch/cyclopentanon.htm			Accessed May 2015
	1,2-Propanediol	1.04	SOLV-DB	56	1.74819	?	SOLV-DB		0.0185714		7	PASS		Rowan SSG	S. Slater and M. Savelski, Journal of Environmental Science and Health Part A, 2007, 42, 1595-1605.
	Tri(ethylene glycol)	1.1195	SOLV-DB	49	1.6902	?	SOLV-DB		0.0228469		8	PASS
	Acetyltributyl citrate	1.05	MSDS (Sigma-Aldrich)	42.7	1.63043	25	HSDB		0.0245902		9	PASS		First criterion: A upper threshold was established regarding the density:viscosity ratio, limiting the solvent set to a maximum of 130 candidates. This is derived from Stokes' law for settling velocity under centrifugation, where the variables relevant to the solvent are present as density over viscosity.
	α-Terpineol	0.9364	SOLV-DB	36.5	1.56229	?	SOLV-DB		0.0256548		10	PASS
	Di(ethylene glycol)	1.12	SOLV-DB	38.5	1.58546	?	SOLV-DB		0.0290909		11	PASS
	Triethyl citrate	1.137	MSDS (Sigma-Aldrich)	35.2	1.54654	25	HSDB		0.0323011		12	PASS		Requirement
	Oleic acid	0.89	MSDS (Sigma-Aldrich)	25.6	1.40824	30	HSDB		0.0347656		13	PASS
	2-Aminoethanol	1.012	MSDS (Sigma-Aldrich)	18.95	1.27761	25	HSDB		0.0534037		14	PASS		Maximum density:viscosity ratio		1.2
	Ethylene glycol dibutyl ether	0.83189	SOLV-DB	14.04	1.14737	?	SOLV-DB		0.0592514		15	PASS
	1-Decanol	0.829	MSDS (Sigma-Aldrich)	13.11	1.1176	20	MSDS (Sigma-Aldrich)		0.0632342		16	PASS
	Triacetin	1.155	Eastman technical data	17.4	1.24055	20	Eastman technical data		0.0663793		17	PASS
	Ethylene glycol	1.11	SOLV-DB	16.1	1.20683	25	HSDB		0.0689441		18	PASS
	Dimethyl phthalate	1.19	MSDS (Sigma-Aldrich)	17.2	1.23553	25	HSDB		0.069186		19	PASS
	m-Cresol	1.034	MSDS (Sigma-Aldrich)	12.9	1.11059	25	HSDB		0.080155		20	PASS
	2-Pyrrolidinone	1.12	MSDS (Sigma-Aldrich)	13.3	1.12385	25	HSDB		0.0842105		21	PASS
	2-Ethylhexanol	0.8344	HSDB	9.8	0.991226	20	HSDB		0.0851429		22	PASS
	1,3-Dioxolane-4-methanol (glycerol formal)	1.215	Glaconchemie technical data	14.2	1.15229	25	Glaconchemie technical data		0.0855634		23	PASS
	Diethyl phthalate	1.12	MSDS (Sigma-Aldrich)	12.9	1.11059	20	ECHA register		0.0868217		24	PASS
	Solketal: ((2,2-dimethyl-1,3-dioxolan-4-yl)methanol) 4-methanol)	1.066	Glaconchemie technical data	11	1.04139	25	Glaconchemie technical data		0.0969091		25	PASS
	1-Heptanol	0.82	SOLV-DB	7.4	0.869232	20	HSDB		0.110811		26	PASS
	1-Octanol	0.82157	SOLV-DB	7.363	0.867055	?	SOLV-DB		0.111581		27	PASS
	Cyrene	1.25	F.Hoffmann-La Roche Ltd.	11.03	1.04258	20	This work		0.113327		28	PASS
	Lauric acid	0.8679	HSDB	7.3	0.863323	50	HSDB		0.11889		29	PASS
	Dibenzyl ether	1.043	MSDS (Sigma-Aldrich)	8.719	0.940467	?	HSDB		0.119624		30	PASS
	Sulpholane	1.2604	SOLV-DB	10.29	1.01242	?	SOLV-DB		0.122488		31	PASS
	2-Octanol	0.8171	SOLV-DB	6.49	0.812245	?	SOLV-DB		0.125901		32	PASS
	Benzyl benzoate	1.118	MSDS (Sigma-Aldrich)	8.292	0.918659	25	HSDB		0.134829		33	PASS
	Eugenol	1.067	MSDS (Sigma-Aldrich)	7.817	0.89304	20	HSDB		0.136497		34	PASS
	Isoeugenol	1.084	MSDS (Sigma-Aldrich)	7.476	0.873669	20	HSDB		0.144997		35	PASS
	Octanoic acid	0.91	MSDS (Sigma-Aldrich)	5.74	0.758912	?	HSDB		0.158537		36	PASS
	Tetrahydrofurfuryl alcohol	1.0483	SOLV-DB	6.24	0.795185	?	SOLV-DB		0.167997		37	PASS
	Omnia: Butyl-3-hydroxybutyrate	0.971	MSDS (Eastman)	5.77	0.761176	25	MSDS (Eastman)		0.168284		38	PASS
	Isobutanol	0.7978	SOLV-DB	4.703	0.672375	15	HSDB		0.169636		39	PASS
	Methyl oleate	0.874	MSDS (Sigma-Aldrich)	4.88	0.68842	30	HSDB		0.179098		40	PASS
	Benzyl alcohol	1.045	MSDS (Sigma-Aldrich)	5.474	0.738305	25	HSDB		0.190902		41	PASS
	Isoamyl alcohol	0.809	MSDS (Sigma-Aldrich)	4.2	0.623249	25	Smallwood 1996		0.192619		42	PASS
	Diethylene glycol monobutyl ether	0.953	MSDS (Sigma-Aldrich)	4.9	0.690196	20	HSDB		0.19449		43	PASS
	Cyclohexanol	0.9684	SOLV-DB	4.6	0.662758	25	HSDB		0.210522		44	PASS
	2-Methyl-2-butanol	0.8096	HSDB	3.79	0.578639	25	HSDB		0.213615		45	PASS
	Ethoxybenzene	0.966	MSDS (Sigma-Aldrich)	4.24	0.627366	-30	HSDB		0.22783		46	PASS
	Dimethyl isosorbide	1.15	MSDS (Sigma-Aldrich)	5	0.69897	25	Dottikon technical data		0.23		47	PASS
	1-Pentanol	0.8108	SOLV-DB	3.512	0.545555	?	SOLV-DB		0.230866		48	PASS
	Aniline	1.022	MSDS (Sigma-Aldrich)	4.4	0.643453	25	Smallwood 1996		0.232273		49	PASS
	Furfuryl alcohol	1.1285	SOLV-DB	4.62	0.664642	25	HSDB		0.244264		50	PASS
	Phenol	1.071	MSDS (Sigma-Aldrich)	4.3	0.633468	43	Smallwood 1996		0.24907		51	PASS
	Diethylene glycol monoethyl ether	0.9841	SOLV-DB	3.85	0.585461	25	HSDB		0.25561		52	PASS
	Butyl lactate	0.98	SOLV-DB	3.8	0.579784	?	SOLV-DB		0.257895		53	PASS
	Decamethylcyclopentasiloxane (D5)	0.958	MSDS (Sigma-Aldrich)	3.7	0.568202	25	Ab Rani 2014		0.258919		54	PASS
	Triethylene glycol dimethyl ether	0.99	SOLV-DB	3.8	0.579784	?	SOLV-DB		0.260526		55	PASS
	N-Methylacetamide	0.957	MSDS (Sigma-Aldrich)	3.65	0.562293	30	HSDB		0.262192		56	PASS
	2-Butanol	0.80241	SOLV-DB	2.998	0.476832	?	SOLV-DB		0.267648		57	PASS
	Heptanoic acid	0.918	MSDS (Sigma-Aldrich)	3.4	0.531479	30	HSDB		0.27		58	PASS
	Dipropylene glycol monomethyl ether	0.95	SOLV-DB	3.5	0.544068	25	HSDB		0.271429		59	PASS
	2-Butoxyethanol (butyl cellosolve)	0.89625	SOLV-DB	3.15	0.498311	25	HSDB		0.284524		60	PASS
	Tributylphosphate	0.979	MSDS (Sigma-Aldrich)	3.39	0.5302	25	HSDB		0.288791		61	PASS
	Diethylene glycol monomethyl ether	1.0167	SOLV-DB	3.48	0.541579	25	HSDB		0.292155		62	PASS
	cis-Decalin	0.897	MSDS (Sigma-Aldrich)	2.99	0.475671	25	HSDB		0.3		63	PASS
	Diphenyl ether	1.06611	SOLV-DB	3.4909	0.542937	27	HSDB		0.305397		64	PASS
	1-Butanol	0.80575	SOLV-DB	2.544	0.405517	25	HSDB		0.316726		65	PASS
	3,3-Dimethyl-2-butanone	0.805	MSDS (Sigma-Aldrich)	2.47	0.392697	-53	HSDB		0.325911		66	PASS
	1-Propanol	0.7996	SOLV-DB	2.256	0.353339	20	HSDB		0.354433		67	PASS
	Quinoline	1.093	MSDS (Sigma-Aldrich)	2.997	0.476687	30	HSDB		0.364698		68	PASS
	Diethylene glycol dibutyl ether	0.89	SOLV-DB	2.39	0.378398	?	SOLV-DB		0.372385		69	PASS
	Methyl lactate	1.09	SOLV-DB	2.9	0.462398	?	SOLV-DB		0.375862		70	PASS
	Ethyl lactate	1.03	SOLV-DB	2.7	0.431364	?	SOLV-DB		0.381481		71	PASS
	2-Propanol	0.79	SOLV-DB	2.038	0.309204	25	HSDB		0.387635		72	PASS
	Dimethyl glutarate	1.09	MSDS (Sigma-Aldrich)	2.7577	0.440547	20	MSDS (Sigma-Aldrich)		0.395257		73	PASS
	Cyclohexanone	0.9452	SOLV-DB	2.2	0.342423	25	HSDB		0.429636		74	PASS
	Octamethylcyclotetrasiloxane (D4)	0.956	MSDS (Sigma-Aldrich)	2.19	0.340444	25	Ab Rani 2014		0.43653		75	PASS
	Morpholine	0.996	MSDS (Sigma-Aldrich)	2.2	0.342423	25	Smallwood 1996		0.452727		76	PASS
	Propylene carbonate	1.1951	SOLV-DB	2.53	0.403121	?	SOLV-DB		0.472372		77	PASS
	γ-Valerolactone	1.05	MSDS (Sigma-Aldrich)	2.18	0.338456	25	MSDS (Thermo)		0.481651		78	PASS
	1-Methoxy-2-propanol	0.924	Smallwood 1996	1.9	0.278754	25	Smallwood 1996		0.486316		79	PASS
	2-Ethoxyethanol (ethyl cellosolve)	0.9252	SOLV-DB	1.84	0.264818	25	HSDB		0.502826		80	PASS
	N,N-Dimethyl aniline	0.956	MSDS (Sigma-Aldrich)	1.89	0.276462	2.5	HSDB		0.50582		81	PASS
	N,N'-Dimethylethyleneurea (DMEU)	1.056	MSDS (Sigma-Aldrich)	2.0592	0.313699	20	MSDS (Sigma-Aldrich)		0.512821		82	PASS
	Dimethyl sulphoxide	1.09537	SOLV-DB	1.991	0.299071	?	SOLV-DB		0.550161		83	PASS
	1,2,3-Trichloropropane	1.387	MSDS (Sigma-Aldrich)	2.505	0.398808	20	HSDB		0.553693		84	PASS
	β-Pinene	0.86	HSDB	1.522	0.182415	25	HSDB		0.565046		85	PASS
	Tributylamine	0.778	MSDS (Sigma-Aldrich)	1.35	0.130334	25	HSDB		0.576296		86	PASS
	Acetophenone	1.03	MSDS (Sigma-Aldrich)	1.74	0.240549	25	Smallwood 1996		0.591954		87	PASS
	Ethylenediamine	0.899	MSDS (Sigma-Aldrich)	1.5	0.176091	25	HSDB		0.599333		88	PASS
	Formic acid	1.21405	SOLV-DB	1.966	0.293584	?	SOLV-DB		0.617523		89	PASS
	2-Methoxyethanol (methyl cellosolve)	0.97	SOLV-DB	1.57	0.1959	?	SOLV-DB		0.617834		90	PASS
	NMP	1.033	SOLV-DB	1.666	0.221675	?	SOLV-DB		0.620048		91	PASS
	Diethylene glycol diethyl ether	0.9063	SOLV-DB	1.4	0.146128	?	SOLV-DB		0.647357		92	PASS
	α-Pinene	0.858	MSDS (Sigma-Aldrich)	1.303	0.114944	25	HSDB		0.65848		93	PASS
	γ-Butyrolactone	1.1254	SOLV-DB	1.7	0.230449	?	SOLV-DB		0.662		94	PASS
	Nitrobenzene	1.196	MSDS (Sigma-Aldrich)	1.8	0.255273	25	Smallwood 1996		0.664444		95	PASS
	Butyric acid	0.958	MSDS (Sigma-Aldrich)	1.426	0.15412	25	HSDB		0.671809		96	PASS
	Furfural	1.1545	SOLV-DB	1.587	0.200577	25	HSDB		0.727473		97	PASS
	Chloroacetic acid	1.58	HSDB (solid at 20 °C)	2.16	0.334454	70	HSDB		0.731481		98	PASS
	2-Ethoxyethyl acetate	0.96761	SOLV-DB	1.32	0.120574	20	HSDB		0.733038		99	PASS
	Ethanol	0.7937	SOLV-DB	1.08	0.0334238	25	Smallwood 1996		0.734907		100	PASS
	Cyclopentanone	0.951	MSDS (Sigma-Aldrich)	1.29	0.11059	?	Redesta		0.737209		101	PASS
	Benzaldehyde	1.045	MSDS (Sigma-Aldrich)	1.321	0.120903	25	HSDB		0.791067		102	PASS
	Cyclohexane	0.779	MSDS (Sigma-Aldrich)	0.98	-0.00877392	25	Smallwood 1996		0.794898		103	PASS
	n-Hexyl acetate	0.8681	SOLV-DB	1.075	0.0314085	?	SOLV-DB		0.807535		104	PASS
	Benzonitrile	1.01	HSDB	1.25	0.09691	25	HSDB		0.808		105	PASS
	Ethyl morpholine	0.91	MSDS (Sigma-Aldrich)	1.08	0.0334238	20	HSDB		0.842593		106	PASS
	n-Decane	0.73	MSDS (Sigma-Aldrich)	0.838	-0.076756	25	HSDB		0.871122		107	PASS
	1,1,2,2-Tetrachloroethane	1.586	MSDS (Sigma-Aldrich)	1.77	0.247973	20	HSDB		0.896045		108	PASS
	2,6-Dimethyl-4-heptanone	0.808	MSDS (Sigma-Aldrich)	0.896	-0.047692	21	HSDB		0.901786		109	PASS
	d-Limonene	0.8383	SOLV-DB	0.923	-0.0347983	?	SOLV-DB		0.908234		110	PASS
	Dibutoxymethane	0.835	MSDS (Sigma-Aldrich)	0.904305	-0.0436851	25	MSDS (Sigma-Aldrich)		0.923361		111	PASS
	1,4-Dioxane	1.02797	SOLV-DB	1.087	0.0362295	?	SOLV-DB		0.945695		112	PASS
	Diethylene glycol dimethyl ether	0.9384	SOLV-DB	0.989	-0.00480371	?	SOLV-DB		0.948837		113	PASS
	Octamethyltrisiloxane (MDM)	0.82	MSDS (Sigma-Aldrich)	0.85	-0.0705811	25	Ab Rani 2014		0.964706		114	PASS
	Propionic acid	0.992	MSDS (Sigma-Aldrich)	1.02	0.00860017	25	HSDB		0.972549		115	PASS
	1,2-Dichlorobenzene	1.306	MSDS (Sigma-Aldrich)	1.324	0.121888	25	HSDB		0.986405		116	PASS
	Acetic acid	1.04392	SOLV-DB	1.056	0.0236639	25	HSDB		0.988561		117	PASS
	2-Heptanone	0.81123	SOLV-DB	0.815	-0.0888424	?	SOLV-DB		0.995374		118	PASS
	Isoamyl acetate	0.876	MSDS (Sigma-Aldrich)	0.872	-0.0594835	20	HSDB		1.00459		119	PASS
	N,N-Dimethyl acetamide	0.936	SOLV-DB	0.927	-0.0329203	?	SOLV-DB		1.00971		120	PASS
	Amyl acetate	0.8719	SOLV-DB	0.862	-0.0644927	?	SOLV-DB		1.01148		121	PASS
	Pyridine	0.978	MSDS (Sigma-Aldrich)	0.88	-0.0555173	25	Smallwood 1996		1.11136		122	PASS
	Water	1	MSDS (Sigma-Aldrich)	0.89	-0.05061	25	Smallwood 1996		1.1236		123	PASS
	N,N-Dimethyl formamide	0.945	Smallwood 1996	0.82	-0.0861861	25	Smallwood 1996		1.15244		124	PASS
	o-Xylene	0.87594	SOLV-DB	0.76	-0.119186	25	HSDB		1.15255		125	PASS
	Cumene	0.864	MSDS (Sigma-Aldrich)	0.737	-0.132533	25	HSDB		1.17232		126	PASS
	Ethylene glycol diethyl ether	0.8351	SOLV-DB	0.7	-0.154902	?	SOLV-DB		1.193		127	PASS
	Ethyl butyrate	0.875	MSDS (Sigma-Aldrich)	0.711	-0.14813	15	HSDB		1.23066	too high	128	FAIL
	m-Dichlorobenzene	1.288	MSDS (Sigma-Aldrich)	1.044	0.0187005	25	HSDB		1.23372	too high	129	FAIL
	Diethylamine	0.707	MSDS (Sigma-Aldrich)	0.571	-0.243364	25	HSDB		1.23818	too high	130	FAIL
	Anisole	0.98932	SOLV-DB	0.789	-0.102923	?	SOLV-DB		1.25389	too high	131	FAIL
	Dibutyl ether	0.7641	SOLV-DB	0.602	-0.220404	?	SOLV-DB		1.26927	too high	132	FAIL
	Acetic anhydride	1.08	MSDS (Sigma-Aldrich)	0.843	-0.0741724	25	HSDB		1.28114	too high	133	FAIL
	Isobutyl acetate	0.867	MSDS (Sigma-Aldrich)	0.676	-0.170053	25	HSDB		1.28254	too high	134	FAIL
	Butylamine	0.73683	SOLV-DB	0.574	-0.241088	25	HSDB		1.28368	too high	135	FAIL
	Butyl acetate	0.88	SOLV-DB	0.685	-0.164309	25	HSDB		1.28467	too high	136	FAIL
	Cyclohexene	0.811	MSDS (Sigma-Aldrich)	0.625	-0.20412	25	HSDB		1.2976	too high	137	FAIL
	Butyronitrile	0.794	MSDS (Sigma-Aldrich)	0.6	-0.221849	20	HSDB		1.32333	too high	138	FAIL
	Bromobenzene	1.49	MSDS (Sigma-Aldrich)	1.124	0.0507663	20	HSDB		1.32562	too high	139	FAIL
	2-Nitropropane	0.992	MSDS (Sigma-Aldrich)	0.74	-0.130768	25	Smallwood 1996		1.34054	too high	140	FAIL
	Ethyl benzene	0.86253	SOLV-DB	0.64	-0.19382	25	HSDB		1.3477	too high	141	FAIL
	1-Hexanol	0.81534	SOLV-DB	0.592	-0.227678	25	HSDB		1.37726	too high	142	FAIL
	2-Hexanone	0.8067	SOLV-DB	0.584	-0.233587	?	SOLV-DB		1.38134	too high	143	FAIL
	Chlorobenzene	1.106	MSDS (Sigma-Aldrich)	0.8	-0.09691	25	Smallwood 1996		1.3825	too high	144	FAIL
	n-Octane	0.703	MSDS (Sigma-Aldrich)	0.5	-0.30103	25	Smallwood 1996		1.406	too high	145	FAIL
	p-Xylene	0.85661	SOLV-DB	0.603	-0.219683	25	HSDB		1.42058	too high	146	FAIL
	Methanol	0.78637	SOLV-DB	0.544	-0.264401	25	HSDB		1.44553	too high	147	FAIL
	Benzene	0.8736	SOLV-DB	0.604	-0.218963	25	HSDB		1.44636	too high	148	FAIL
	Isooctane (2,2,4-trimethylpentane)	0.692	MSDS (Sigma-Aldrich)	0.477	-0.321482	25	Smallwood 1996		1.45073	too high	149	FAIL
	4-Methyl-2-pentanone (methyl isobutyl ketone)	0.7963	SOLV-DB	0.5463	-0.262569	?	SOLV-DB		1.45762	too high	150	FAIL
	1,4-Dichlorobenzene	1.241	MSDS (Sigma-Aldrich)	0.839	-0.076238	55	HSDB		1.47914	too high	151	FAIL
	m-Xylene	0.86009	SOLV-DB	0.581	-0.235824	25	HSDB		1.48036	too high	152	FAIL
	1,2-Dichloroethane	1.256	MSDS (Sigma-Aldrich)	0.84	-0.0757207	20	HSDB		1.49524	too high	153	FAIL
	Hexamethyldisiloxane (M2)	0.764	MSDS (Sigma-Aldrich)	0.5	-0.30103	25	Ab Rani 2014		1.528	too high	154	FAIL
	1,1,1-Trichloroethane	1.32	SOLV-DB	0.858	-0.0665127	20	HSDB		1.53846	too high	155	FAIL
	Toluene	0.86219	SOLV-DB	0.56	-0.251812	25	HSDB		1.53962	too high	156	FAIL
	Nitroethane	1.045	MSDS (Sigma-Aldrich)	0.661	-0.179799	25	HSDB		1.58094	too high	157	FAIL
	Dimethyl carbonate	1.069	MSDS (Sigma-Aldrich)	0.664	-0.177832	20	HSDB		1.60994	too high	158	FAIL
	Acetylacetone	0.975	MSDS (Sigma-Aldrich)	0.6	-0.221849	20	HSDB		1.625	too high	159	FAIL
	n-Propyl acetate	0.888	SOLV-DB	0.544	-0.264401	25	HSDB		1.63235	too high	160	FAIL
	Carbon tetrachloride	1.58436	SOLV-DB	0.97	-0.0132283	25	Smallwood 1996		1.63336	too high	161	FAIL
	Methyl butyrate	0.9	SOLV-DB	0.55	-0.259637	?	SOLV-DB		1.63636	too high	162	FAIL
	Tetrahydrofuran	0.8892	SOLV-DB	0.53	-0.275724	20	HSDB		1.67774	too high	163	FAIL
	2-Pentanone	0.8015	SOLV-DB	0.473	-0.325139	25	HSDB		1.6945	too high	164	FAIL
	Propanenitrile	0.772	MSDS (Sigma-Aldrich)	0.454	-0.342944	15	HSDB		1.70044	too high	165	FAIL
	Cyclopentane	0.751	MSDS (Sigma-Aldrich)	0.44	-0.356547	20	HSDB		1.70682	too high	166	FAIL
	n-Heptane	0.67946	SOLV-DB	0.397	-0.401209	?	SOLV-DB		1.71149	too high	167	FAIL
	Isopropyl acetate	0.8702	SOLV-DB	0.49	-0.309804	25	HSDB		1.77592	too high	168	FAIL
	3-Pentanone	0.813	MSDS (Sigma-Aldrich)	0.444	-0.352617	25	HSDB		1.83108	too high	169	FAIL
	Nitromethane	1.127	MSDS (Sigma-Aldrich)	0.614	-0.211832	25	HSDB		1.8355	too high	170	FAIL
	2-Methyltetrahydrofuran	0.853	MSDS (Sigma-Aldrich)	0.46	-0.337242	25	Aycock 2007		1.85435	too high	171	FAIL
	Ethyl propionate	0.884	SOLV-DB	0.473	-0.325139	?	SOLV-DB		1.86892	too high	172	FAIL
	Diisopropyl ether	0.71854	SOLV-DB	0.379	-0.421361	?	SOLV-DB		1.89588	too high	173	FAIL
	Tetrachloroethylene	1.623	MSDS (Sigma-Aldrich)	0.839	-0.076238	25	HSDB		1.93445	too high	174	FAIL
	1-Chlorobutane	0.886	MSDS (Sigma-Aldrich)	0.45	-0.346787	20	HSDB		1.96889	too high	175	FAIL
	Triethylamine	0.72305	SOLV-DB	0.363	-0.440093	?	SOLV-DB		1.99187	too high	176	FAIL
	Methyl ethyl ketone	0.7997	SOLV-DB	0.4	-0.39794	25	HSDB		1.99925	too high	177	FAIL
	1,2-Dimethoxyethane	0.867	MSDS (Sigma-Aldrich)	0.4335	-0.363011	20	MSDS (Sigma-Aldrich)		2	too high	178	FAIL
	n-Hexane	0.65484	SOLV-DB	0.326	-0.486782	20	HSDB		2.00871	too high	179	FAIL
	Ethyl acetate	0.89455	SOLV-DB	0.44	-0.356547	25	HSDB		2.03307	too high	180	FAIL
	Acetonitrile	0.786	MSDS (Sigma-Aldrich)	0.38	-0.420216	25	Smallwood 1996		2.06842	too high	181	FAIL
	1-Bromobutane	1.276	MSDS (Sigma-Aldrich)	0.606	-0.217527	25	HSDB		2.10561	too high	182	FAIL
	t-Butyl methyl ether	0.76	SOLV-DB	0.34	-0.468521	?	SOLV-DB		2.23529	too high	183	FAIL
	Methyl acetate	0.9279	SOLV-DB	0.381	-0.419075	20	HSDB		2.43543	too high	184	FAIL
	Furan	0.936	MSDS (Sigma-Aldrich)	0.38	-0.420216	20	HSDB		2.46316	too high	185	FAIL
	Acetone	0.791	MSDS (Sigma-Aldrich)	0.32	-0.49485	20	HSDB		2.47188	too high	186	FAIL
	Chloroform	1.4797	SOLV-DB	0.563	-0.249492	20	HSDB		2.62824	too high	187	FAIL
	Z-1,2-Dichloroethylene	1.284	MSDS (Sigma-Aldrich)	0.48	-0.318759	20	HSDB		2.675	too high	188	FAIL
	2-Chloropropane	0.859	MSDS (Sigma-Aldrich)	0.32	-0.49485	20	HSDB		2.68437	too high	189	FAIL
	Trichloroethylene	1.5	SOLV-DB	0.55	-0.259637	25	HSDB		2.72727	too high	190	FAIL
	n-Pentane	0.62139	SOLV-DB	0.225	-0.647817	?	SOLV-DB		2.76173	too high	191	FAIL
	Diethyl ether	0.70782	SOLV-DB	0.2448	-0.611189	20	HSDB		2.89142	too high	192	FAIL
	Methyl formate	0.974	MSDS (Sigma-Aldrich)	0.325	-0.488117	25	HSDB		2.99692	too high	193	FAIL
	1,1-Dichloroethane	1.17	MSDS (Sigma-Aldrich)	0.38	-0.420216	20	HSDB		3.07895	too high	194	FAIL
	DCM	1.325	MSDS (Sigma-Aldrich)	0.43	-0.366532	20	HSDB		3.0814	too high	195	FAIL
	Acetaldehyde	0.785	MSDS (Sigma-Aldrich)	0.2456	-0.609772	15	HSDB		3.19625	too high	196	FAIL
	Carbon disulphide	1.266	MSDS (Sigma-Aldrich)	0.36	-0.443697	25	Smallwood 1996		3.51667	too high	197	FAIL
	1,1-Dichloroethylene	1.213	MSDS (Sigma-Aldrich)	0.3302	-0.481223	20	HSDB		3.67353	too high	198	FAIL
	Bromoethane	1.46	MSDS (Sigma-Aldrich)	0.379	-0.421361	25	HSDB		3.85224	too high	199	FAIL
	MEAN	0.981201		10.9903
	SD	0.193035		68.9557
	Variance of dataset. The viscosity is much more influential than the density of the solvent.

## Sheet: Shortlist
	Solvents are presented in this shortlist if data was available to assess at least one additional criteria to polarity. The full list of solvents is not given because of a shortage of viscosity and surface tension data and proprietary polarity data.
	Solvent name	Hansen D	Hansen P	Hansen H	Distance in Hansen space	Polarity	Surface tension	Density: viscosity		All technical requirements		Polarity notes		Preliminary MSDS health hazards screening	Final solvent candidate shortlist	Experimental concentration of dispersed graphene (relative to NMP)			References
	1,1,1-Trichloroethane	16.8	4.3	2	7.95	FAIL	FAIL	FAIL		Fail								Fail	Hamilton 2009		C. E. Hamilton et al., Nano Lett., 2009, 9, 3460-3462.
	1,1,2,2-Tetrachloroethane	18.8	5.1	5.3	5.1	PASS	PASS	PASS		Pass	1,1,2,2-Tetrachloroethane	Borderline (still considered a pass)		Fatally acute toxicity					Hernandez 2010		Y. Hernandez et al., Langmuir, 2010, 26, 3208-3213.
	1,1-Dichloroethane	16.5	7.8	3	5.77	PASS	FAIL	FAIL		Fail
	1,1-Dichloroethylene	16.4	5.2	2.4	7.43	FAIL	FAIL	FAIL		Fail								Fail
	1,2,3-Trichloropropane	17.8	12.3	3.4	5.26	PASS	PASS	PASS		Pass	1,2,3-Trichloropropane	Borderline (still considered a pass)		Carcinogen, acutely toxic
	1,2-Dichlorobenzene	19.2	6.3	3.3	5.84	PASS	PASS	PASS		Pass	1,2-Dichlorobenzene	Borderline (still considered a pass)		No warnings	1,2-Dichlorobenzene	1.66667	Hamilton et al., 2009
	1,2-Dichloroethane	18	7.4	4.1	4.07	PASS	PASS	FAIL		Fail														Ra	den	visc	ratio
	1,2-Dimethoxyethane	15.8	5.9	6.1	5.79	PASS	FAIL	FAIL		Fail											Benzaldehyde			4.15	1.045	1.321	0.791067
	1,2-Propanediol	16.8	10.4	21.3	13.85	FAIL	PASS	PASS		Fail											1,2,3-Trichloropropane			5.26	1.387	2.505	0.553693
	1,3-Butanediol	16.5	8.1	20.9	13.59	FAIL	PASS	PASS		Fail											Benzonitrile			5.4	1.01	1.25	0.808
	1,3-Dioxolane-4-methanol (glycerol formal)	18.4	10.6	16.5	8.93	FAIL	FAIL	PASS		Fail											Morpholine			5.5	0.996	2.2	0.452727
	1,4-Butanediol	16.6	11	20.9	13.6	FAIL	FAIL	PASS		Fail											Diethyl phthalate			3.31	1.12	12.9	0.0868217
	1,4-Dichlorobenzene	19.7	5.6	2.7	7.09	FAIL	FAIL	FAIL		Fail								Fail			Tetrahydrofurfuryl alcohol			5.33	1.0483	6.24	0.167997
	1,4-Dioxane	17.5	1.8	9	7.68	FAIL	PASS	PASS		Fail											1,2-Dichlorobenzene			5.84	1.306	1.324	0.986405
	1-Bromobutane	16.5	4.1	3.9	7.1	FAIL	FAIL	FAIL		Fail								Fail			Acetophenone			4.04	1.03	1.74	0.591954
	1-Butanol	16	5.7	15.8	9.72	FAIL	FAIL	PASS		Fail											Pyridine			2.74	0.978	0.88	1.11136
	1-Chloropropane	16	7.8	2	7.1232	FAIL	FAIL	FAIL		Fail								Fail			NMP			3.04	1.033	1.666	0.620048
	1-Decanol	16	4.7	10.5	6.71	FAIL	FAIL	PASS		Fail											Triacetin			5.83	1.155	17.4	0.0663793
	1-Heptanol	16	5.3	11.7	6.93	FAIL	FAIL	PASS		Fail											Aniline			6.49	1.022	4.4	0.232273
	1-Hexanol	15.9	5.8	12.5	7.28	FAIL	FAIL	FAIL		Fail								Fail			Cyclohexanone			2.78	0.9452	2.2	0.429636
	1-Methoxy-2-propanol	15.6	6.3	11.6	6.87	FAIL	FAIL	PASS		Fail											Butyl lactate			5.78	0.98	3.8	0.257895
	1-Octanol	16	5	11.2	6.84	FAIL	FAIL	PASS		Fail											N,N-Dimethyl formamide			5.81	0.945	0.82	1.15244
	1-Pentanol	15.9	5.9	13.9	8.22	FAIL	FAIL	PASS		Fail											1,1,2,2-Tetrachloroethane			5.1	1.586	1.77	0.896045
	1-Propanol	16	6.8	17.4	10.79	FAIL	FAIL	PASS		Fail											Cyrene			2.21133	1.25	11.03	0.113327
	2,6-Dimethyl-4-heptanone	16	3.7	4.1	7.77	FAIL	FAIL	PASS		Fail											Cyclopentanone			3.61	0.951	1.29	0.737209
	2-Aminoethanol	17	15.5	21	14.81	FAIL	NO DATA	PASS		Fail											Nitrobenzene			6.23	1.196	1.8	0.664444
	2-Butanol	15.8	5.7	14.5	8.86	FAIL	FAIL	PASS		Fail											Furfural			6.29	1.1545	1.587	0.727473
	2-Butoxyethanol (butyl cellosolve)	16	5.1	12.3	7.4	FAIL	FAIL	PASS		Fail											Diethylene glycol monobutyl ether			5.45	0.953	4.9	0.19449
	2-Chloropropane	15	8	2	8.37735	FAIL	FAIL	FAIL		Fail								Fail			N,N-Dimethyl acetamide			3.67	0.936	0.927	1.00971
	2-Ethoxyethanol (ethyl cellosolve)	15.9	7.2	14	7.86	FAIL	FAIL	PASS		Fail
	2-Ethoxyethyl acetate	15.9	4.7	10.6	6.87	FAIL	FAIL	PASS		Fail
	2-Ethylhexanol	15.9	3.3	11.8	8.39	FAIL	NO DATA	PASS		Fail
	2-Heptanone	16.2	5.7	4.1	6.24	PASS	FAIL	PASS		Fail
	2-Hexanone	15.3	6.1	4.1	7.24	FAIL	FAIL	FAIL		Fail								Fail
	2-Methoxyethanol (methyl cellosolve)	16	8.2	15	8.4	FAIL	FAIL	PASS		Fail
	2-Methyl-2-butanol	15.3	6.1	13.3	8.41	FAIL	FAIL	PASS		Fail
	2-Methyltetrahydrofuran	16.9	5	4.3	5.91	PASS	NO DATA	FAIL		Fail
	2-Nitropropane	16.2	12.1	4.1	5.81	PASS	FAIL	FAIL		Fail
	2-Octanol	16.1	4.2	9.1	6.51	FAIL	FAIL	PASS		Fail
	2-Pentanone	16	7.6	4.7	5.28	PASS	PASS	FAIL		Fail										Introducing density and viscosity as a combined parameter explains the poor performance of pyridine, and the high performance of Cyrene and cyclohexanone. The density/viscosity threshold could have been tightened to exclude pyridine, but was set to what it is so that DMF was accepted as having the correct physical properties. Butyl lactate and triacetin join Cyrene as the favoured solvents after …
	2-Propanol	15.8	6.1	16.4	10.26	FAIL	FAIL	PASS		Fail
	2-Pyrrolidinone	18.2	12	9	3.02	PASS	NO DATA	PASS		Fail
	3,3-Dimethyl-2-butanone	15.1	5.5	3.3	8.21	FAIL	FAIL	PASS		Fail
	3-Methyl-2-butanone	15.6	6.7	4	6.59	PASS	FAIL	FAIL		Fail
	3-Pentanone	15.8	7.6	4.7	5.59	PASS	FAIL	FAIL		Fail
	4-Methyl-2-pentanone (methyl isobutyl ketone)	15.3	6.1	4.1	7.24	FAIL	FAIL	FAIL		Fail								Fail
	Acetaldehyde	14.7	12.5	7.9	7.34	FAIL	FAIL	FAIL		Fail								Fail
	Acetic acid	14.5	8	13.5	9.18	FAIL	FAIL	PASS		Fail
	Acetic anhydride	16	11.7	10.2	5.29	PASS	PASS	FAIL		Fail
	Acetone	15.5	10.4	7	5.17	PASS	FAIL	FAIL		Fail
	Acetonitrile	15.3	18	6.1	10.36	FAIL	FAIL	FAIL		Fail								Fail
	Acetophenone	18.8	9	4	4.04	PASS	PASS	PASS		Pass	Acetophenone	Strong polarity match		Mutagencity
	Acetylacetone	16.1	10	6.2	4.14	PASS	FAIL	FAIL		Fail
	Acetyltributyl citrate	16.7	2.5	7.4	7.29	FAIL	NO DATA	PASS		Fail
	Amyl acetate	15.8	3.3	6.1	7.61	FAIL	FAIL	PASS		Fail
	Aniline	20.1	5.8	11.2	6.49	PASS	PASS	PASS		Pass	Aniline	Borderline (still considered a pass)		Carcinogen, acutely toxic
	Anisole	17.8	4.4	6.9	4.98	PASS	PASS	FAIL		Fail
	Benzaldehyde	19.4	7.4	5.3	4.15	PASS	PASS	PASS		Pass	Benzaldehyde			Mutagencity
	Benzene	18.4	0	2	10.94	FAIL	FAIL	FAIL		Fail								Fail
	Benzonitrile	18.8	12	3.3	5.4	PASS	PASS	PASS		Pass	Benzonitrile	Borderline (still considered a pass)		No warnings	Benzonitrile	1.02128	Hernandez et al. 2010
	Benzyl alcohol	18.4	6.3	13.7	6.76	FAIL	PASS	PASS		Fail
	Benzyl benzoate	20	5.1	5.2	6.32	PASS	FAIL	PASS		Fail
	Bromobenzene	19.2	5.5	4.1	5.76	PASS	PASS	FAIL		Fail
	Bromoethane	16.5	8.4	2.3	6.24	PASS	FAIL	FAIL		Fail
	Butyl acetate	15.8	3.7	6.3	7.26	FAIL	FAIL	FAIL		Fail								Fail
	Butyl lactate	15.8	6.5	10.2	5.78	PASS	PASS	PASS		Pass	Butyl lactate	Borderline (still considered a pass)		No warnings	Butyl lactate	0.111	This work
	Butylamine	16.2	4.5	8	6.01	PASS	FAIL	FAIL		Fail
	Butyric acid	15.7	4.8	12	7.74	FAIL	FAIL	PASS		Fail
	Butyronitrile	15.3	12.4	5.1	6.75	FAIL	FAIL	FAIL		Fail								Fail
	Carbon disulphide	20.2	0	0.6	12.5	FAIL	FAIL	FAIL		Fail								Fail
	Carbon tetrachloride	17.8	0	0.6	11.71	FAIL	FAIL	FAIL		Fail								Fail
	Chloroacetic acid	17.6	11	15.9	8.41249	FAIL	PASS	PASS		Fail
	Chlorobenzene	19	4.3	2	7.84	FAIL	PASS	FAIL		Fail
	Chloroform	17.8	3.1	5.7	6.53	PASS	FAIL	FAIL		Fail
	cis-Decalin	17.6	0	0	12.1	FAIL	NO DATA	PASS		Fail
	Cumene	18.1	1.2	1.2	10.39	FAIL	FAIL	PASS		Fail
	Cyclohexane	16.8	0	0.2	12.19	FAIL	FAIL	PASS		Fail
	Cyclohexanol	17.4	4.1	13.5	7.88	FAIL	PASS	PASS		Fail
	Cyclohexanone	17.8	8.4	5.1	2.78	PASS	PASS	PASS		Pass	Cyclohexanone	Strong polarity match		No warnings	Cyclohexanone	1.55319	Hernandez et al. 2010
	Cyclohexene	17.2	1	2	10.2	FAIL	FAIL	FAIL		Fail								Fail
	Cyclopentane	16.4	0	1.8	11.47	FAIL	NO DATA	FAIL		Fail
	Cyclopentanone	17.9	11.9	5.2	3.61	PASS	PASS	PASS		Pass	Cyclopentanone	Strong polarity match		No warnings	Cyclopentanone	1.80851	Hernandez et al. 2010
	Cyrene	18.8	10.6	6.9	2.21133	PASS	PASS	PASS		Pass	Cyrene	Strong polarity match		No warnings	Cyrene	13.3	This work
	DCM	17	7.3	7.1	2.89	PASS	FAIL	FAIL		Fail
	Decamethylcyclopentasiloxane (D5)	12.9	1.3	1	14.59	FAIL	FAIL	PASS		Fail
	Di(ethylene glycol)	16.6	12	19	11.95	FAIL	FAIL	PASS		Fail
	Dibenzyl ether	19.6	3.4	5.2	7.16	FAIL	NO DATA	PASS		Fail
	Dibutoxymethane	15.7	4	3.9	7.9806	FAIL	NO DATA	PASS		Fail
	Dibutyl ether	15.2	3.4	3.2	9.29624	FAIL	FAIL	FAIL		Fail								Fail
	Diethoxymethane (ethylal)	15.4	5.7	5.1	6.83813	FAIL	FAIL	NO DATA		Fail
	Diethyl ether	14.5	2.9	4.6	9.97848	FAIL	FAIL	FAIL		Fail								Fail
	Diethyl phthalate	17.6	9.6	4.5	3.31	PASS	PASS	PASS		Pass	Diethyl phthalate	Strong polarity match		Reproductive toxicity
	Diethylamine	14.9	2.3	6.1	9.49	FAIL	FAIL	PASS		Fail
	Diethylene glycol dibutyl ether	15.8	4.7	4.4	7.17	FAIL	FAIL	PASS		Fail
	Diethylene glycol diethyl ether	15.8	5.9	5.6	5.94	PASS	FAIL	PASS		Fail
	Diethylene glycol dimethyl ether	16	5.9	6.2	5.45985	PASS	FAIL	PASS		Fail
	Diethylene glycol monobutyl ether	16	7	10.6	5.45	PASS	PASS	PASS		Pass	Diethylene glycol monobutyl ether	Borderline (still considered a pass)		REACH restriction applies
	Diethylene glycol monoethyl ether	16.1	9.2	12.2	5.89	PASS	FAIL	PASS		Fail
	Diethylene glycol monomethyl ether	16.2	7.8	12.6	6.26	PASS	FAIL	PASS		Fail
	Diisopropyl ether	15.1	3.2	3.2	9.54	FAIL	FAIL	FAIL		Fail								Fail
	Dimethoxymethane	15	1.8	8.6	9.65	FAIL	FAIL	NO DATA		Fail
	Dimethyl carbonate	15.5	8.6	9.7	5.43	PASS	FAIL	FAIL		Fail
	Dimethyl ether	15.2	6.1	5.7	6.75278	FAIL	FAIL	NO DATA		Fail
	Dimethyl glutarate	16.1	7.7	8.3	4.17	PASS	FAIL	PASS		Fail
	Dimethyl isosorbide	17.6	7.1	7.5	2.35	PASS	NO DATA	PASS		Fail
	Dimethyl phthalate	18.6	10.8	4.9	3.4	PASS	NO DATA	PASS		Fail
	Dimethyl sulphide	16.1	6.4	7.4	4.79	PASS	FAIL	NO DATA		Fail
	Dimethyl sulphoxide	18.4	16.4	10.2	7.57	FAIL	PASS	PASS		Fail
	Diphenyl ether	19.4	3.4	4	7.51	FAIL	PASS	PASS		Fail
	Dipropylene glycol	16.5	10.6	17.7	10.52	FAIL	NO DATA	PASS		Fail
	Dipropylene glycol monomethyl ether	15.5	5.7	11.2	7.09	FAIL	FAIL	PASS		Fail
	d-Limonene	17.2	1.8	4.3	8.39	FAIL	FAIL	PASS		Fail
	Ethanethiol	15.7	6.5	7.1	5.42	PASS	FAIL	NO DATA		Fail
	Ethanol	15.8	8.8	19.4	12.51	FAIL	FAIL	PASS		Fail
	Ethoxybenzene	18.4	4.5	4	6.11	PASS	NO DATA	PASS		Fail
	Ethyl acetate	15.8	5.3	7.2	5.97	PASS	FAIL	FAIL		Fail
	Ethyl benzene	17.8	0.6	1.4	10.7	FAIL	FAIL	FAIL		Fail								Fail
	Ethyl butyrate	15.5	5.6	5	6.78	FAIL	FAIL	PASS		Fail
	Ethyl formate	15.5	8.4	8.4	5.13	PASS	FAIL	NO DATA		Fail
	Ethyl lactate	16	7.6	12.5	6.48	PASS	FAIL	PASS		Fail
	Ethyl morpholine	17.7	5	6.6	4.48	PASS	NO DATA	PASS		Fail
	Ethyl propionate	15.5	6.1	4.9	6.56	PASS	FAIL	FAIL		Fail
	Ethylene glycol	17	11	26	18.49	FAIL	FAIL	PASS		Fail
	Ethylene glycol dibutyl ether	15.7	4.5	4.2	7.51	FAIL	NO DATA	PASS		Fail
	Ethylene glycol diethyl ether	15.4	5.4	5.2	6.96	FAIL	NO DATA	PASS		Fail
	Ethylenediamine	16.6	8.8	17	9.73	FAIL	NO DATA	PASS		Fail
	Eugenol	19	7.5	13	5.94	PASS	FAIL	PASS		Fail
	Formamide	17.2	26.2	19	20.39	FAIL	FAIL	NO DATA		Fail
	Formic acid	14.6	10	14	9.3	FAIL	PASS	PASS		Fail
	Furan	17	1.8	5.3	8.12	FAIL	NO DATA	FAIL		Fail
	Furfural	18.6	14.9	5.1	6.29	PASS	PASS	PASS		Pass	Furfural	Borderline (still considered a pass)		Carcinogen, acutely toxic
	Furfuryl alcohol	17.4	7.6	15.1	7.69	FAIL	PASS	PASS		Fail
	Glycerol	17.4	11.3	27.2	19.64	FAIL	FAIL	PASS		Fail
	Glycerol carbonate	17.9	25.5	17.4	18.88	FAIL	NO DATA	PASS		Fail
	Heptanoic acid	16.1	5.2	10.3	6.17	PASS	NO DATA	PASS		Fail
	Hexamethyldisiloxane (M2)	12.6	2	0	15.14	FAIL	FAIL	FAIL		Fail								Fail
	Isoamyl acetate	15.3	3.1	7	8.25	FAIL	NO DATA	PASS		Fail
	Isoamyl alcohol	15.8	5.2	13.3	8.22	FAIL	FAIL	PASS		Fail
	Isobutanol	15.1	5.7	15.9	10.67	FAIL	FAIL	PASS		Fail
	Isobutyl acetate	15.1	3.7	6.3	8.18	FAIL	FAIL	FAIL		Fail								Fail
	Isoeugenol	18.9	5.7	9.9	4.59	PASS	FAIL	PASS		Fail
	Isooctane (2,2,4-trimethylpentane)	14.1	0	0	14.37	FAIL	FAIL	FAIL		Fail								Fail
	Isopropyl acetate	14.9	4.5	8.2	7.86	FAIL	FAIL	FAIL		Fail								Fail
	Lauric acid	16.2	4.1	7.4	6.33	PASS	FAIL	PASS		Fail
	Levulinic acid	17.1	10.4	13.5	6.17	PASS	PASS	NO DATA		Fail
	m-Cresol	18.5	6.5	13.7	6.7	FAIL	NO DATA	PASS		Fail
	m-Dichlorobenzene	19.2	5.1	2.7	6.96	FAIL	PASS	PASS		Fail
	Mesitylene	18	0.6	0.6	11.23	FAIL	FAIL	NO DATA		Fail
	Methanol	14.7	12.3	22.3	16.3	FAIL	FAIL	FAIL		Fail								Fail
	Methyl acetate	15.5	7.2	7.6	5.42	PASS	FAIL	FAIL		Fail
	Methyl butyrate	15.8	4.9	6.2	6.40078	PASS	FAIL	FAIL		Fail
	Methyl ethyl ketone	16	9	5.1	4.78	PASS	FAIL	FAIL		Fail
	Methyl formate	15.3	8.4	10.2	6.02	PASS	FAIL	FAIL		Fail
	Methyl lactate	16.9	8.3	16.1	8.74	FAIL	PASS	PASS		Fail
	Methyl oleate	16.2	3.8	4.5	7.31	FAIL	FAIL	PASS		Fail
	Methylcyclopentane	16	0	1	12.1	FAIL	FAIL	NO DATA		Fail
	Morpholine	18	4.9	11	5.5	PASS	PASS	PASS		Pass	Morpholine	Borderline (still considered a pass)		Mutagencity
	m-Xylene	17.8	2.6	2.8	8.31	FAIL	FAIL	FAIL		Fail								Fail
	N,N-Dimethyl acetamide	16.8	11.5	9.4	3.67	PASS	PASS	PASS		Pass	N,N-Dimethyl acetamide	Strong polarity match		Reproductive toxicity
	N,N-Dimethyl aniline	18.3	3.2	5.5	6.51	FAIL	PASS	PASS		Fail
	N,N-Dimethyl formamide	17.4	13.7	11.3	5.81	PASS	PASS	PASS		Pass	N,N-Dimethyl formamide	Borderline (still considered a pass)		Reproductive toxicity
	N,N'-Dimethylethyleneurea (DMEU)	18.2	10	8.1	0.9	PASS	NO DATA	PASS		Fail
	n-Decane	15.7	0	0	12.92	FAIL	FAIL	PASS		Fail
	n-Heptane	15.3	0	0	13.23	FAIL	FAIL	FAIL		Fail								Fail
	n-Hexane	14.9	0	0	13.57	FAIL	FAIL	FAIL		Fail								Fail
	n-Hexyl acetate	15.8	2.9	5.9	7.97	FAIL	FAIL	PASS		Fail
	Nitrobenzene	20	10.6	3.1	6.23	PASS	PASS	PASS		Pass	Nitrobenzene	Borderline (still considered a pass)		Carcinogen, reproductive toxicity
	Nitroethane	16	15.5	4.5	8.04	FAIL	PASS	FAIL		Fail
	Nitromethane	15.8	18.8	6.1	10.59	FAIL	PASS	FAIL		Fail
	N-Methyl formamide	17.4	18.8	15.9	12.61	FAIL	PASS	NO DATA		Fail
	N-Methylacetamide	16.9	17	13	9.6	FAIL	PASS	PASS		Fail
	NMP	18	12.3	7.2	3.04	PASS	PASS	PASS		Pass	NMP	Strong polarity match		Reproductive toxicity
	n-Octane	15.5	0	0	13.07	FAIL	FAIL	FAIL		Fail								Fail
	n-Pentane	14.5	0	0	14	FAIL	FAIL	FAIL		Fail								Fail
	n-Propyl acetate	15.3	4.3	7.6	7.36	FAIL	FAIL	FAIL		Fail								Fail
	n-Propylamine	16	4.9	8.6	6.01	PASS	FAIL	NO DATA		Fail
	Octamethylcyclotetrasiloxane (D4)	12.8	1.3	1	14.73	FAIL	FAIL	PASS		Fail
	Octamethyltrisiloxane (MDM)	12.2	1.8	0	15.81	FAIL	FAIL	PASS		Fail
	Octanoic acid	15.7	3.3	8.2	7.58	FAIL	FAIL	PASS		Fail
	Oleic acid	16	2.8	6.2	7.78	FAIL	PASS	PASS		Fail
	Omnia: Butyl-3-hydroxybutyrate	16.5	5.9	10.7	5.43691	PASS	NO DATA	PASS		Fail
	o-Xylene	17.8	1	3.1	9.5	FAIL	FAIL	PASS		Fail
	p-Cymene	17.3	2.4	2.4	8.8	FAIL	FAIL	NO DATA		Fail
	Phenol	18.5	5.9	14.9	8.02	FAIL	PASS	PASS		Fail
	Propanenitrile	15.3	14.3	5.5	7.7	FAIL	FAIL	FAIL		Fail								Fail
	Propionic acid	14.7	5.3	12.4	9.04	FAIL	FAIL	PASS		Fail
	Propylene carbonate	20	18	4.1	10.23	FAIL	PASS	PASS		Fail
	p-Xylene	17.8	1	3.1	9.5	FAIL	FAIL	FAIL		Fail								Fail
	Pyridine	19	8.8	5.9	2.74	PASS	PASS	PASS		Pass	Pyridine	Strong polarity match		No warnings	Pyridine	0.425532	Hernandez et al. 2010
	Pyrrolidine	17.9	6.5	7.4	2.82	PASS	FAIL	NO DATA		Fail
	Quinoline	20.5	5.6	5.7	6.53	FAIL	FAIL	PASS		Fail
	Solketal: ((2,2-dimethyl-1,3-dioxolan-4-yl)methanol) 4-methanol)	16.6	7.9	12	5.31883	PASS	FAIL	PASS		Fail
	Sulpholane	17.8	17.4	8.7	8.17	FAIL	PASS	PASS		Fail
	t-Butyl ethyl ether	14.4	3.5	2.7	10.51	FAIL	FAIL	NO DATA		Fail
	t-Butyl methyl ether	14.8	4.3	5	8.56	FAIL	FAIL	FAIL		Fail								Fail
	Tetrachloroethylene	18.3	5.7	0	8.52	FAIL	FAIL	FAIL		Fail								Fail
	Tetraethylene glycol	16.4	9.4	15.3	8.25	FAIL	PASS	PASS		Fail
	Tetrahydrofuran	16.8	5.7	8	4.34	PASS	FAIL	FAIL		Fail
	Tetrahydrofurfuryl alcohol	17.8	8.2	12.9	5.33	PASS	PASS	PASS		Pass	Tetrahydrofurfuryl alcohol	Borderline (still considered a pass)		Reproductive toxicity
	Toluene	18	1.4	2	9.74	FAIL	FAIL	FAIL		Fail								Fail
	Tri(ethylene glycol)	16	12.5	18.6	12.04	FAIL	FAIL	PASS		Fail
	Triacetin	16.5	4.5	9.1	5.83	PASS	PASS	PASS		Pass	Triacetin	Borderline (still considered a pass)		No warnings	Triacetin	1.05556	This work
	Tributylamine	15.7	2.2	2.1	10.15	FAIL	FAIL	PASS		Fail
	Tributylphosphate	16.3	6.3	4.3	5.67	PASS	FAIL	PASS		Fail
	Trichloroacetic acid	18.3	7	13	5.81	PASS	FAIL	FAIL		Fail
	Trichloroethylene	18	3.1	5.3	6.65	FAIL	FAIL	FAIL		Fail								Fail
	Triethylamine	15.5	0.4	1	12.21	FAIL	FAIL	FAIL		Fail								Fail
	Triethylcitrate	16.5	4.9	12	6.84	FAIL	NO DATA	PASS		Fail
	Triethylene glycol dimethyl ether	15.9	5.9	6.4	5.56	PASS	FAIL	PASS		Fail
	Triethylphosphate	16.7	11.4	9.2	3.66	PASS	PASS	NO DATA		Fail
	Water	15.5	16	42.3	35.6	FAIL	FAIL	PASS		Fail
	Z-1,2-Dichloroethylene	17	8	3.2	5.09	PASS	FAIL	FAIL		Fail
	α-Pinene	16.4	1.1	2.2	10.38	FAIL	FAIL	PASS		Fail
	α-Terpineol	17.1	3.6	7.6	5.98	PASS	FAIL	PASS		Fail
	β-Pinene	16.3	1.1	1.9	10.6	FAIL	FAIL	PASS		Fail
	γ-Butyrolactone	18	16.6	7.4	7.31	FAIL	PASS	PASS		Fail
	γ-Valerolactone	16.9	11.5	6.3	3.41	PASS	NO DATA	PASS		Fail
	Total solvents meeting at least one requirement:	178				80	53	130		Number of solvents:		22			Number of solvents:		8
						http://www.york.ac.uk/res/s4/

## Sheet: Final decision
	This data has been extracted from the University of York 'S4' solvent database. Values were collected from freely available sources except the Cyrene data, which was requested from F.Hoffmann-La Roche Ltd. We would like to thank F.Hoffmann-La Roche Ltd. for allowing us to use this data from the SDS they compiled.
	Solvent name		Bio-based carbon content (calculation)	Supplier		Autoignition Temperature (°C)	Ref	Standard deviations from mean		Flash Point, closed cup (°C)	Ref	Standard deviations from mean		LD50 oral (mg/kg, rat)	log(LD50)	Test notes	Ref	Relative to LD50) of 2000 mg/kg		Vapor pressure (mmHg)	log(VP)	Temp. for vapor pressure (°C)	Ref	Standard deviations from mean inverted so high values are desirable		Octanol-Water Partition Constant (Log Kow)	Ref	Standard deviations from mean inverted so high values are desirable		EC50 (mg/L) 48hr Daphnia magna	log(EC50)	Test notes	Ref	Standard deviations from mean		Biodegradation
	1,2-Dichlorobenzene		0			648	MSDS (Sigma-Aldrich)	2.27318		66	Rowan SSG	0.119683		500	2.69897		Rowan SSG	0.25		1.2	0.0791812	20	MSDS (Sigma-Aldrich)	0.658368		3.43	Rowan SSG	-0.937248		0.74	-0.130768		EPA ECOTOX	-0.908206		Considered biodegradable.
	Benzonitrile		0			550	NIOSH MSDS	1.41863		70	MSDS (Sigma-Aldrich)	0.18892		971	2.98722		MSDS (Sigma-Aldrich)	0.4855		0.75	-0.124939	20	MSDS (Sigma-Aldrich)	0.71845		1.56	MSDS (Sigma-Aldrich)	0.0121306		122	2.08636	24hr	EPA ECOTOX	-0.313528		Considered biodegradable.
	Butyl lactate		0.428571	Green Biologics		382	HSDB	-0.0463155		71	SOLV-DB	0.206229		2000	3.30103		SOLV-DB	1		0.2	-0.69897	20	http://www.inchem.org/	0.887414		1.366	SOLV-DB	0.110622		423	2.62634		EPA ECOTOX	-0.168695		Considered biodegradable.
	Cyclohexanone		0			420	SOLV-DB	0.285041		44	SOLV-DB	-0.261118		1535	3.18611		SOLV-DB	0.7675		4.33	0.636488	25	SOLV-DB	0.494327		0.81	ChemSpider	0.392897		820	2.91381	24hr	EPA ECOTOX	-0.091589		Considered biodegradable.
	Cyclopentanone		0			445	MSDS (Imperial College)	0.503038		30	MSDS (Sigma-Aldrich)	-0.503445		1180	3.07188		MSDS (ScienceLab)	0.59		11.4	1.0569	25	HSDB	0.370579		0.24	(calculated)	0.68228		1435	3.15685	24 hr	EPA ECOTOX	-0.0264014		Considered biodegradable.
	Cyrene: Dihydrolevoglucosenone		1	Circa		296	F.Hoffmann-La Roche Ltd.	-0.796227		108	F.Hoffmann-La Roche Ltd.	0.846667		2000	3.30103	min. value	F.Hoffmann-La Roche Ltd.	1		0.21	-0.677781	25	F.Hoffmann-La Roche Ltd.	0.881177		-1.52	F.Hoffmann-La Roche Ltd.	1.57581		100	2	min. value	F.Hoffmann-La Roche Ltd.	-0.336692		Considered biodegradable.
	Pyridine		0			482	MSDS (Sigma-Aldrich)	0.825675		17	MSDS (Sigma-Aldrich)	-0.728464		891	2.94988		MSDS (Sigma-Aldrich)	0.4455		20	1.30103	25	MSDS (Sigma-Aldrich)	0.298721		0.65	Rowan SSG	0.474128		940	2.97313		MSDS (Sigma-Aldrich)	-0.0756798		Considered biodegradable.
	Triacetin		0.333333	Eastman		433	MSDS (Fisher)	0.398399		138	MSDS (Fisher)	1.36594		3000	3.47712		MSDS (Fisher)	1.5		0.00248	-2.60555	25	MSDS (Fisher)	1.44861		0.36	MSDS (Eastman, calc.)	0.621357		380	2.57978		MSDS (Spectrum)	-0.181183		Considered biodegradable.
	S4 database mean average					387.311				59.0855				5020	3.7007					206.963	2.31589					1.58389				1800.05	3.25528
	S4 database SD					114.68				57.773				7712	3.88717					2496.64	3.39736					1.96971				5349.18	3.72829
	Mean + SD					501.992				116.859					7.58787						5.71325					3.5536					6.98357
	Mean - SD					272.631				1.31256					-0.186463						-1.08146					-0.385816					-0.473003
	NMP (for comparison)		0			346	HSDB	-0.360232		92	SOLV-DB	0.569721		3914	3.59262	SOLV-DB		1.957		0.341	-0.467246	25	SOLV-DB	0.819207		-0.38	ChemSpider	0.997047		1000	3	min. value, 24hr	MSDS (Sigma-Aldrich)	-0.0684722
	Regulatory limits and requirements in European standards		0.25	European standard TS/16766.		n/a				60	CLP 'flammable liquids' threshold	0.0158285		2000	3.30103		CLP 'acute toxicity' threshold	1		0.075	-1.12494		Industrial Emissions 2010/75/EU 'VOC' threshold	1.0128		4	CLP 'harmful to the aquatic environment' threshold (in practice EC 50 <100 also)	-1.22663		100	2		CLP 'harmful to the aquatic environment' threshold (in practice logP ≥4 also)	-0.336692
	Solvent name		# Best in class	# Worst in class		Bio-based?	Summation of scores	Rank		All breaches of regulatory limits
	1,2-Dichlorobenzene		1	3		No	1.71773	8		CLP 'acute toxicity' threshold (harmful if swallowed); Industrial emissions VOC definition; CLP 'harmful to the aquatic environment'.
	Benzonitrile					No	2.76519	4		CLP 'acute toxicity' threshold (harmful if swallowed); Industrial emissions VOC definition.
	Butyl lactate					Partially	3.05816	3		Industrial emissions VOC definition.
	Cyclohexanone					No	2.61489	5		CLP 'acute toxicity' threshold (harmful if swallowed); CLP 'flammable liquids' threshold; Industrial emissions VOC definition.
	Cyclopentanone		1			No	2.50967	6		CLP 'acute toxicity' threshold (harmful if swallowed); CLP 'flammable liquids' threshold; Industrial emissions VOC definition.
	Cyrene: Dihydrolevoglucosenone		1	1		Yes	3.50672	2		Industrial emissions VOC definition.
	Pyridine			2		No	2.19054	7		CLP 'acute toxicity' threshold (harmful if swallowed); CLP 'flammable liquids' threshold; Industrial emissions VOC definition.
	Triacetin		3			Partially	4.83388	1		None.
																																	http://www.york.ac.uk/res/s4/
						Summation of scores and the rank is purely for guidance.
	Additional notes: REACH Annex VIII requirements
	Persistence (PBT) not anticipated - all solvents biodegrade
	Bioaccumulation (PBT) not anticipated (log P <4)
	Toxicity (PBT) not anticipated (EC50 >0.01)
	Carcinogenity (CMR) not identified
	Mutagenicity (CMR) not identified
	Reprotoxicity (CMR) not identified
		Solvent data ploted against a scale of +/- 1 standard deviation (mean average shown as a black diamond). An exception is made for LD50 where a linear scale is given for improved clarity. Solvent data shown as red circles (in the order left to right as listed in the table above). Cyrene is shown as a filled red data point. NMP (for reference) is given as a X data point, but please note NMP is repr…
											2
											10
										chart
										2	10
										3
										4
										5
										6	1	-1
										7	1	0
										8	1	1
										9

## Sheet: Bio-based solvent summary
	Solvent name	Bio-based carbon content	Source	Supplier	Reference	Hansen D	Hansen P	Hansen H	Distance in Hansen space	Polarity	Surface tension	Density: viscosity		Additional comments
	1,2-Pentanediol	1	Pyrolysis of carbohydrate	Pennakem	agrobiobase.com/en/database/bioproducts/agriculture-forestry-viticulture/12-pentanediol (accessed 30-10-2015)	16.7	7.2	16.8	9.69	FAIL	NO DATA	NO DATA
	1,2-Propanediol	1	Derived from glycerol	Oelon	agrobiobase.com/en/database/bioproducts/food-feed/radianol-4713-bio-propylene-glycol (accessed 30-10-2015)	16.8	10.4	21.3	13.85	FAIL	PASS	PASS
	1,3-Dioxolane-4-methanol (glycerol formal)	0.75	Derived from glycerol	Lambiotte&Cie	agrobiobase.com/en/database/bioproducts/agriculture-forestry-viticulture/glycerol-formal (accessed 30-10-2015)	18.4	10.6	16.5	8.93	FAIL	FAIL	PASS
	1,3-Propanediol	1	Derived from glycerol	DuPont-Tate & Lyle	agrobiobase.com/en/database/bioproducts/agriculture-forestry-viticulture/13-propanediol-biobased (accessed 30-10-2015)	16.8	13.5	23.2	16.24	FAIL	NO DATA	NO DATA
	1,4-Butanediol	1	Fermentation product	Genomatica	www.genomatica.com/products/genobdoprocess (accessed 30-10-2015)	16.6	11	20.9	13.6	FAIL	FAIL	PASS
	1-Butanol	1	Fermentation product	Numerous (fuel market)	www.biofuelstp.eu/butanol.html (accessed 30-10-2015)	16	5.7	15.8	9.72	FAIL	FAIL	PASS
	2-Butanol	1	Fermentation product	DuPont	US patent 2008/0274525 A1	15.8	5.7	14.5	8.86	FAIL	FAIL	PASS
	2-Methyltetrahydrofuran	1	Pyrolysis of carbohydrate	Pennakem	V. Pace et al., ChemSusChem., 2012, 5, 1369-1379.	16.9	5	4.3	5.91	PASS	NO DATA	FAIL
	2-Octanol	1	Synthesised from vegetable oils	Arkema	agrobiobase.com/en/database/bioproducts/chemistry-formulation-synthesis/2-octanol (accessed 30-10-2015)	16.1	4.2	9.1	6.51	FAIL	FAIL	PASS
	2-Propanol	1	Fermentation product	Lanzatech	US patent 2012/0252083 A1	15.8	6.1	16.4	10.26	FAIL	FAIL	PASS
	Acetic acid	1	Fermentation product	Sekab	www.sekab.com/chemistry/acetic-acid (accessed 30-10-2015)	14.5	8	13.5	9.18	FAIL	FAIL	PASS
	Acetone	1	Fermentation product	Numerous (plastisicer market)		15.5	10.4	7	5.17	PASS	FAIL	FAIL
	Acetyltributyl citrate	0.176471	Made from citric acid	Numerous (plastisicer market)		16.7	2.5	7.4	7.29	FAIL	NO DATA	PASS
	Butyl lactate	43-100%	Made from lactic acid	Galactic	www.lactic.com/en-us/products/productrange/galaster%E2%84%A2galasolv%E2%84%A2.aspx (accessed 30-10-2015)	15.8	6.5	10.2	5.78	PASS	PASS	PASS		Considered as a candidate
	Butyric acid	1	Fermentation product	Numerous (food and fragrances)		15.7	4.8	12	7.74	FAIL	FAIL	PASS
	Cyrene	1	Pyrolysis of carbohydrate	Circa	J. Sherwood et al., Chem. Commun., 2014, 50, 9650-9652.	18.8	10.6	6.9	2.21133	PASS	PASS	PASS		Considered as a candidate
	Diethoxymethane (ethylal)	0.8	Made with bio-ethanol	Lambiotte&Cie	agrobiobase.com/en/database/bioproducts/chemistry-formulation-synthesis/ethylal (accessed 30-10-2015)	15.4	5.7	5.1	6.84	FAIL	FAIL	NO DATA
	Dimethyl ether	1	Made from bio-gas	Chemrec	www.biofuelstp.eu/bio-dme.html (accessed 30-10-215)	15.2	6.1	5.7	6.75	FAIL	FAIL	NO DATA
	Dimethyl isosorbide	0.75	Pyrolysis of carbohydrate	Roquette and downstream	www.lotioncrafter.com/dimethyl-isosorbide-dmi.html (accessed 30-10-2015)	17.6	7.1	7.5	2.35	PASS	FAIL*	PASS		*Based on predicted data from HSPiP (28.0 dynes/cm)
	Dimethyl sulphoxide	1	Made from dimethyl sulphide	Numerous (paper and pulp sector)		18.4	16.4	10.2	7.57	FAIL	PASS	PASS
	d-Limonene	1	Essential oils	Numerous (fragrance sector)	www.who.int/ipcs/publications/cicad/en/cicad05.pdf (accessed 30-10-15)	17.2	1.8	4.3	8.39	FAIL	FAIL	PASS
	Ethanol	1	Fermentation product	Numerous (fuel market)	www.biofuelstp.eu/bioethanol.html (accessed 30-10-15)	15.8	8.8	19.4	12.51	FAIL	FAIL	PASS
	Ethyl acetate	1	Made from bio-ethanol	Sekab	www.sekab.com/chemistry/ethyl-acetate (accessed 30-10-2015).	15.8	5.3	7.2	5.97	PASS	FAIL	FAIL
	Ethyl lactate	1	Made from lactic acid	Galactic	www.lactic.com/en-us/13_ethyl-lactate/index.html	16	7.6	12.5	6.48	PASS	FAIL	PASS
	Ethylene glycol	1	Made from bio-ethanol	India glycols	www.indiaglycols.com/product_groups/monoethylene_glycol.htm (accessed 02-11-2015)	17	11	26	18.49	FAIL	FAIL	PASS
	Eugenol	1	Essential oils	Numerous (fragrance sector)		19	7.5	13	5.94	PASS	FAIL	PASS
	Furfural	1	Pyrolysis of carbohydrate	Numerous	www.furan.com/furfural.html (accessed 30-10-2015)	18.6	14.9	5.1	6.29	PASS	PASS	PASS		Eliminated on the basis of toxicity and mutagenicity
	Furfuryl alcohol	1	Pyrolysis of carbohydrate	Numerous	www.furan.com/furfuryl_alcohol_applications.html (accessed 02-11-2015)	17.4	7.6	15.1	7.69	FAIL	PASS	PASS
	Glycerol	1	Vegetable oils	Numerous (fuel market)	Y. Gu et al., Green Chem., 2010 ,12, 1127-1138.	17.4	11.3	27.2	19.64	FAIL	FAIL	PASS
	Glycerol carbonate	0.75	Derived from glycerol	Glacochemie	www.glaconchemie.de (accessed 02-11-2015)	17.9	25.5	17.4	18.88	FAIL	NO DATA	PASS
	Isoamyl alcohol	1	Fermentation product	Numerous (fusel oil)		15.8	5.2	13.3	8.22	FAIL	FAIL	PASS
	Isobutanol	1	Fermentation product	Gevo	US patent 2011/0087000 A1	15.1	5.7	15.9	10.67	FAIL	FAIL	PASS
	Isoeugenol	1	Essential oils	Numerous (fragrance sector)		18.9	5.7	9.9	4.59	PASS	FAIL	PASS
	Lactic acid	1	Fermentation product	Numerous (polymer market)	cellulac.co.uk/en/main/process-diagram (accessed 30-10-2015)	17.3	10.1	23.3	15.68	FAIL	NO DATA	NO DATA
	Lauric acid	1	Vegetable oils	Numerous (fuel market)		16.2	4.1	7.4	6.33	PASS	FAIL	PASS
	Levulinic acid	1	Pyrolysis of carbohydrate	GF Biochemicals	http://www.gfbiochemicals.com/products/#levulinic-acid	17.1	10.4	13.5	6.17	PASS	PASS	NO DATA**		**Viscosity data unavailable. Lower performance than NMP (see M. Sharma et al., Chem. Commun., 2016, DOI: 10.1039/C6CC00256K).
	Methanol	1	Made from bio-gas	Numerous	www.irena.org/DocumentDownloads/Publications/IRENA-ETSAP%20Tech%20Brief%20I08%20Production_of_Bio-methanol.pdf (accessed 02-11-2015)	14.7	12.3	22.3	16.3	FAIL	FAIL	FAIL
	Methyl lactate	0.75	Made from lactic acid	Numerous (fuel market)		16.9	8.3	16.1	8.74	FAIL	PASS	PASS
	Methyl oleate	0.947368	Synthesised from vegetable oils	Numerous (fuel market)		16.2	3.8	4.5	7.31	FAIL	FAIL	PASS
	Oleic acid	1	Vegetable oils	Numerous (fuel market)		16	2.8	6.2	7.78	FAIL	PASS	PASS
	p-Cymene	1	Made from limonene/pinene	Numerous (fragrance sector)	J. A. Dávila et al., Waste and Biomass Valorization, 2015, 6, 253-261.	17.3	2.4	2.4	8.81	FAIL	FAIL	NO DATA
	Solketal: ((2,2-dimethyl-1,3-dioxolan-4-yl)methanol) 4-methanol)	0.5	Derived from glycerol	Rhodia	www.rhodia.com.cn/en/binaries/ Flyer_AugeoSL191_EN.pdf (accessed 30-10-2015)	16.6	7.9	12	5.31883	PASS	FAIL	PASS
	t-Butyl ethyl ether	0.333333	Made with bio-ethanol	Braskem	www.braskem.com/site.aspx/ethyl-tertiary-butyl-ether (accessed 30-10-15)	14.4	3.5	2.7	10.51	FAIL	FAIL	NO DATA
	Tetrahydrofuran	1	Pyrolysis of carbohydrate	Pennakem	agrobiobase.com/en/database/bioproducts/chemistry-formulation-synthesis/thf (accessed 30-10-2015)	16.8	5.7	8	4.34	PASS	FAIL	FAIL
	Tetrahydrofurfuryl alcohol	1	Pyrolysis of carbohydrate	Pennakem	agrobiobase.com/en/database/bioproducts/agriculture-forestry-viticulture/thfa (accessed 30-10-2015)	17.8	8.2	12.9	5.33	PASS	PASS	PASS		Eliminated on the basis of reproductive toxicity
	Triacetin	33%-100%	Derived from glycerol	Eastman	www.eastman.com/Products/Pages/ProductHome.aspx?Product=71001049 (accessed 30-10-2015)	16.5	4.5	9.1	5.83	PASS	PASS	PASS		Considered as a candidate
	Triethyl citrate	1	Made from citric acid	Numerous (plastisicer market)		16.5	4.9	12	6.84	FAIL	NO DATA	PASS
	α-Pinene	1	Essential oils	Numerous (fragrance sector)		16.4	1.1	2.2	10.38	FAIL	FAIL	PASS
	α-Terpineol	1	Essential oils	Numerous (fragrance sector)		17.1	3.6	7.6	5.98	PASS	FAIL	PASS
	β-Pinene	2	Essential oils	Numerous (fragrance sector)		16.3	1.1	1.9	10.6	FAIL	FAIL	PASS
	γ-Valerolactone	1	Pyrolysis of carbohydrate	Numerous (fragrance/fuel additive)	http://www.adv-bio.com/ProductDetail.aspx?ProdNo=1252	16.9	11.5	6.3	3.41	PASS	FAIL*	PASS		*Based on predicted data from HSPiP (29.9 dynes/cm). Failed as a solvent (see M. Sharma et al., Chem. Commun., 2016, DOI: 10.1039/C6CC00256K).
	Total bio-based solvents considered:	51								18	11	38
			http://www.york.ac.uk/res/s4/
